# Supplementary material for: Comparative physiological, metabolomic, and transcriptomic analyses reveal mechanisms of apple dwarfing rootstock root morphogenesis under nitrogen and/or phosphorus deficient conditions
Source: Front Plant Sci. 2023 Jun 19;14:1120777. doi: 10.3389/fpls.2023.1120777 (PMC10315683; doi:10.3389/fpls.2023.1120777)
Supplement: Supplementaty Table 1 — Primer names and sequences. [file Table_1.xls]

## Sheet: Sheet1
SUPPLEMENTARY TABLE 1 Primer names and sequences
Name	Sequence (5’-3’)
qMdEXPA4-F	GATTCACCATCAACGGCCA
qMdEXPA4-R	TGCCAATTACCAGGAGCCA
qMdEXPA7-F	AGAAAGCAAGGCGGAGTGA
qMdEXPA7-R	TTGTCCGAACTGCCAATGA
qMdEXPA11-F	GAGGTCGTTCTGCGATGGTT
qMdEXPA11-R	CCGACGTTGGAGATCATCAC
qMdEXLA2-F	ACGTGGCATTGTGGATGTG
qMdEXLA2-R	ACATTCGGTGCCCAAACTG
qMdEXLB1-F	CACCGACAGTGCCTATTGCT
qMdEXLB1-R	TGCTGTGCTCATCGATCTTG
qMdEXLB2-F	GCAACCAATCCAGCTTCGT
qMdEXLB2-R	CTCATTGGCCTCCATTGCT
qMdActin-F	GAAGATTAAGGTCGTTGCACCACCTG
qMdActin-R	ATTAACATTGCAAAGAGTTTCAAGGT
MdEXPA4-F	GGTACCATGGCAGCTCATCCATTG
Md EXPA4-R	GAGCTCAAATTGCCCCCCTGAGAATGT
MdEXLB1-F	GGATCCATGGCTTTCTCTCTTGGGTCT
MdEXLB1-R	GAGCTCGTTAACTTGAACTCCAGTGTC
