# Supplementary material for: Comparative physiological, metabolomic, and transcriptomic analyses reveal mechanisms of apple dwarfing rootstock root morphogenesis under nitrogen and/or phosphorus deficient conditions
Source: Front Plant Sci. 2023 Jun 19;14:1120777. doi: 10.3389/fpls.2023.1120777 (PMC10315683; doi:10.3389/fpls.2023.1120777)
Supplement: Supplementaty Table 2 — KEGG pathways mapped by differential genes and differential metabolites with higher PCCs. [file Table_2.xlsx]

## Sheet: NNNP vs NNLP
KEGG_map	Description	DiffRatio_meta	BgRatio_meta	P-value_meta	Adjusted P-value_meta	Index_meta	CID_meta	Count_meta	DiffRatio_gene	BgRatio_gene	P-value_gene	Adjusted P-value_gene	Index_gene	KO_gene	Count_gene	Hyperlink
ko01100	Metabolic pathways	62/77	259/342	0.168163	1	pme2292;mws1358;pme1216;pme0490;ML10197929;Lmbn001288;Lmgn000160;mws0001;mws0219;MWSmce580;Zmjn001813;mws2125;pme1383;Zmzn000078;pme3009;pme2559;pme0008;pme2253;pmb1754;Zmgn000447;pme0122;pme0075;pme0278;mws0014;Zmzn000079;Zmpn000199;mws0853;pmb2507;mws0863;mws4174;mws4085;Zmyn000110;MWS2442;mws0866;mws1090;Zmpn000095;pme1119;MWS20143;MWSslk132;mws0064;pmb2657;MWSHY0029;mws0044;MWSslk257;pme3188;…	C00134+C00090+C10164+C00253+C00300+C06010+C02642+C00152+C00049+C05585+C02656+C00074+C00314+C00111+C02341+C01042+C00327+C01040+C00588+C00197+C02727+C00624+C00666+C01494+C00279+C00879+C02325+C00672+C00673+C00645+C00482+C06156+C00085+C00092+C00103+C01096+C00294+C01514+C19615+C05631+C03406+C00389+C01617+C00055+C00105+C00455+C01231+C01367+C00020+C00130+C00015+C00689+C00008+C00061+C00190+C00029+C00043+…	62	408/755	7083/16855	7.10169e-12	8.94812e-10	MD01G1110100;MD01G1195200;MD01G1195400;MD07G1261900;MD16G1010900;novel.510;MD16G1123600;MD04G1016000;MD02G1243100;MD09G1157900;MD10G1132600;MD14G1002100;MD17G1119700;MD07G1157900;MD07G1158000;MD16G1071800;MD13G1071000;MD01G1238700;MD17G1034800;MD15G1137200;MD15G1154800;MD13G1111300;MD15G1133900;MD03G1116100;MD00G1175600;MD01G1174400;MD14G1002500;MD01G1219500;MD07G1290500;MD02G1257400;MD08G1126500…	K00008+K00008+K00008+K00008+K00016+K00021+K00036+K00036+K00051+K00058+K00059+K00059+K00083+K00103+K00103+K00108+K00108+K00121+K00122+K00128+K00131+K00134+K00166+K00253+K00261+K00261+K00261+K00264+K00264+K00276+K00306+K00423+K00423+K00423+K00430+K00430+K00430+K00430+K00430+K00430+K00430+K00430+K00430+K00430+K00430+K00430+K00430+K00430+K00430+K00430+K00430+K00430+K00430+K00430+K00430+K00430+K00430+…	408	https:\\www.genome.jp\dbget-bin\www_bget?map01100
ko01110	Biosynthesis of secondary metabolites	31/77	132/342	0.415733	1	pme2292;pme0490;Lmbn001288;mws0001;mws0219;mws2125;Zmzn000078;pme0008;Zmgn000447;pme0075;pme0278;mws0014;Zmzn000079;mws0853;mws4085;MWS2442;mws0866;mws1090;MWS20143;mws0064;pmb2657;MWSHY0029;mws0044;pmb0981;pmb0532;mws0178;mws2523;pme2117;MWS5083;pmb2922;pme2746	C00134+C00253+C06010+C00152+C00049+C00074+C00111+C00327+C00197+C00624+C00666+C01494+C00279+C02325+C00482+C00085+C00092+C00103+C01514+C05631+C03406+C00389+C01617+C00020+C00130+C00852+C00689+C00008+C00061+C00029+C00016	31	256/755	4040/16855	1.81078e-10	2.28158e-08	MD12G1082400;MD14G1077200;MD16G1010900;novel.510;MD16G1123600;MD04G1016000;MD09G1157900;MD10G1132600;MD14G1002100;MD17G1119700;MD01G1238700;MD15G1137200;MD13G1111300;MD15G1133900;MD01G1219500;MD07G1290500;MD02G1257400;MD16G1052000;MD00G1088400;MD02G1124700;MD02G1138900;MD03G1013200;MD03G1014200;MD04G1170900;MD05G1075100;MD05G1345800;MD06G1038800;MD07G1301400;MD08G1230700;MD08G1230900;MD09G1105900…	K00006+K00006+K00016+K00021+K00036+K00036+K00058+K00059+K00059+K00083+K00121+K00128+K00134+K00166+K00264+K00264+K00276+K00430+K00430+K00430+K00430+K00430+K00430+K00430+K00430+K00430+K00430+K00430+K00430+K00430+K00430+K00430+K00430+K00430+K00430+K00430+K00430+K00430+K00430+K00430+K00430+K00487+K00511+K00511+K00511+K00640+K00660+K00688+K00688+K00695+K00695+K00695+K00695+K00695+K00696+K00703+K00789+…	256	https:\\www.genome.jp\dbget-bin\www_bget?map01110
ko00940	Phenylpropanoid biosynthesis	5/77	25/342	0.702542	1	mws0014;mws0853;mws4085;mws0178;mws0011	C01494+C02325+C00482+C00852+C01533	5	63/755	616/16855	7.48e-10	9.42479e-08	MD17G1119700;MD16G1052000;MD00G1088400;MD02G1124700;MD02G1138900;MD03G1013200;MD03G1014200;MD04G1170900;MD05G1075100;MD05G1345800;MD06G1038800;MD07G1301400;MD08G1230700;MD08G1230900;MD09G1105900;MD10G1321200;MD11G1004100;MD11G1061400;MD13G1011000;MD13G1011200;MD13G1053000;MD15G1172800;MD15G1238800;MD15G1294200;MD15G1321200;MD03G1051400;MD00G1190900;MD03G1215300;MD05G1105800;MD05G1105900;MD12G1211…	K00083+K00430+K00430+K00430+K00430+K00430+K00430+K00430+K00430+K00430+K00430+K00430+K00430+K00430+K00430+K00430+K00430+K00430+K00430+K00430+K00430+K00430+K00430+K00430+K00430+K00487+K01188+K01188+K01188+K01188+K01188+K01188+K01904+K09753+K09753+K09753+K10775+K12355+K12355+K12356+K13065+K13065+K13065+K13065+K13065+K13065+K13065+K13065+K13065+K13065+K13065+K13065+K13065+K13065+K13065+K13065+K13065+…	63	https:\\www.genome.jp\dbget-bin\www_bget?map00940
ko00941	Flavonoid biosynthesis	5/77	27/342	0.770474	1	MWS20143;mws0064;MWSHY0029;mws0044;mws0178	C01514+C05631+C00389+C01617+C00852	5	29/755	209/16855	6.05188e-08	7.62537e-06	MD03G1051400;MD13G1285100;MD07G1186300;MD07G1233400;MD03G1001100;MD06G1071600;MD12G1168100;MD14G1210700;MD05G1335600;MD17G1224900;MD02G1273000;MD04G1016900;MD04G1032000;MD04G1050800;MD04G1188000;MD07G1095200;MD07G1095500;MD09G1169600;MD09G1267700;MD10G1161400;MD10G1199500;MD10G1199600;MD10G1200300;MD11G1116900;MD13G1109000;MD15G1001600;novel.2605;MD01G1210600;MD07G1280800	K00487+K00660+K01859+K01859+K05277+K05277+K05278+K05280+K08695+K13065+K13065+K13065+K13065+K13065+K13065+K13065+K13065+K13065+K13065+K13065+K13065+K13065+K13065+K13065+K13065+K13065+K13065+K22845+K22845	29	https:\\www.genome.jp\dbget-bin\www_bget?map00941
ko00945	Stilbenoid, diarylheptanoid and gingerol biosynthesis	1/77	4/342	0.641369	1	mws0178	C00852	1	19/755	116/16855	9.11576e-07	0.000114859	MD03G1051400;MD17G1224900;MD02G1273000;MD04G1016900;MD04G1032000;MD04G1050800;MD04G1188000;MD07G1095200;MD07G1095500;MD09G1169600;MD09G1267700;MD10G1161400;MD10G1199500;MD10G1199600;MD10G1200300;MD11G1116900;MD13G1109000;MD15G1001600;novel.2605	K00487+K13065+K13065+K13065+K13065+K13065+K13065+K13065+K13065+K13065+K13065+K13065+K13065+K13065+K13065+K13065+K13065+K13065+K13065	19	https:\\www.genome.jp\dbget-bin\www_bget?map00945
ko00561	Glycerolipid metabolism	4/77	4/342	0.00241623	0.164304	Zmzn000078;Zmgn000447;mws1090;pmb2922	C00111+C00197+C00103+C00029	4	29/755	244/16855	1.65136e-06	0.000208072	MD15G1137200;MD02G1161000;MD03G1198800;MD04G1234300;MD08G1009800;MD10G1044500;MD10G1270800;MD11G1153800;MD15G1008800;MD15G1009100;MD15G1275100;MD06G1233800;MD02G1020400;MD15G1163200;MD15G1058400;MD04G1148000;MD12G1161400;MD14G1039100;MD01G1136800;MD07G1136200;MD07G1201800;MD09G1151400;MD12G1162100;MD08G1102500;MD15G1030100;MD06G1230600;MD02G1107800;MD15G1227200;MD07G1224900	K00128+K00679+K00679+K00679+K00679+K00679+K00679+K00679+K00679+K00679+K00679+K01054+K03715+K03715+K06118+K06119+K06119+K09480+K13508+K13508+K13508+K13508+K13508+K15728+K15728+K21362+K22848+K22848+K22920	29	https:\\www.genome.jp\dbget-bin\www_bget?map00561
ko00740	Riboflavin metabolism	2/77	4/342	0.219772	1	MWS5083;pme2746	C00061+C00016	2	10/755	67/16855	0.000751166	0.0946469	MD06G1233400;MD06G1233500;MD13G1016100;MD14G1240300;MD17G1231100;MD00G1123600;MD00G1190500;MD02G1226100;MD02G1226200;MD02G1226400	K14379+K14379+K14379+K14379+K20884+K20884+K20884+K20884+K20884+K20884	10	https:\\www.genome.jp\dbget-bin\www_bget?map00740
ko01240	Biosynthesis of cofactors	20/77	52/342	0.0035228	0.23955	pme0490;mws0219;Zmjn001813;mws2125;pme1383;pme2253;Zmgn000447;Zmzn000079;mws1090;pme3188;pmb0981;pmb0532;pme3007;pme2117;MWS5083;pmb2922;mws4134;pmb0530;pme2651;pme2746	C00253+C00049+C02656+C00074+C00314+C01040+C00197+C00279+C00103+C00105+C00020+C00130+C00015+C00008+C00061+C00029+C00127+C00003+C00006+C00016	20	45/755	617/16855	0.000909858	0.114642	MD10G1132600;MD14G1002100;MD07G1157900;MD07G1158000;MD15G1137200;MD17G1134800;MD17G1156300;MD12G1201100;MD05G1110500;MD08G1075600;MD15G1063100;MD02G1244000;MD06G1144200;MD09G1278300;MD13G1094000;MD00G1085100;MD10G1221000;MD11G1224800;MD02G1319400;MD12G1017400;MD12G1166700;novel.629;MD03G1113000;MD09G1177500;MD09G1177600;MD05G1359400;MD10G1334900;MD04G1123600;MD06G1085800;MD12G1139500;MD16G1202200…	K00059+K00059+K00103+K00103+K00128+K00457+K00789+K00789+K00826+K00826+K00826+K00873+K00939+K00963+K01661+K01937+K01937+K03146+K03639+K05928+K06215+K08679+K08681+K09458+K09458+K10047+K10047+K11153+K11153+K11153+K12502+K13248+K13248+K13800+K14190+K14190+K17744+K19222+K19642+K20884+K20884+K20884+K20884+K20884+K20884	45	https:\\www.genome.jp\dbget-bin\www_bget?map01240
ko00460	Cyanoamino acid metabolism	2/77	10/342	0.699295	1	mws0001;mws0219	C00152+C00049	2	24/755	266/16855	0.000913604	0.115114	MD00G1190900;MD03G1215300;MD05G1105800;MD05G1105900;MD12G1211500;MD15G1374300;MD00G1015600;MD00G1015700;MD00G1012900;MD00G1013000;MD03G1090900;MD03G1091100;MD03G1091900;MD00G1145300;MD12G1211400;MD08G1092600;MD15G1077000;MD00G1052900;MD12G1028800;MD02G1162800;MD17G1125900;MD08G1185700;MD09G1142800;MD09G1284800	K01188+K01188+K01188+K01188+K01188+K01188+K01455+K01455+K08248+K08248+K08248+K08248+K08248+K13031+K13031+K13051+K13051+K16266+K18592+K20802+K22706+K22706+K22706+K22706	24	https:\\www.genome.jp\dbget-bin\www_bget?map00460
ko00564	Glycerophospholipid metabolism	3/77	6/342	0.13032	1	Zmzn000078;pmb1754;mws0120	C00111+C00588+C00670	3	23/755	259/16855	0.00142896	0.180048	MD12G1082400;MD14G1077200;MD07G1077500;MD04G1197500;MD12G1210300;MD15G1006400;MD14G1236000;MD02G1189900;MD17G1203800;MD10G1317900;MD01G1136800;MD07G1136200;MD07G1201800;MD09G1151400;MD12G1162100;MD08G1102500;MD15G1030100;MD02G1172900;MD15G1081200;MD17G1010400;MD09G1006500;MD04G1247600;MD12G1262800	K00006+K00006+K01114+K01115+K01115+K01115+K05929+K06123+K06130+K08744+K13508+K13508+K13508+K13508+K13508+K15728+K15728+K16818+K16818+K18696+K18696+K22389+K22389	23	https:\\www.genome.jp\dbget-bin\www_bget?map00564
ko00073	Cutin, suberine and wax biosynthesis	1/77	1/342	0.225146	1	MWSslk132	C19615	1	11/755	108/16855	0.00902833	1	MD11G1161800;MD17G1011500;MD17G1157600;MD08G1026100;MD09G1007600;MD15G1022800;MD03G1073600;MD11G1079600;MD13G1004700;MD13G1029500;MD13G1208400	K13356+K15400+K15400+K15400+K15400+K15400+K15401+K15401+K15402+K17991+K20769	11	https:\\www.genome.jp\dbget-bin\www_bget?map00073
ko00250	Alanine, aspartate and glutamate metabolism	4/77	12/342	0.273681	1	mws0001;mws0219;pme2559;pmb2657	C00152+C00049+C01042+C03406	4	12/755	127/16855	0.0116382	1	MD00G1175600;MD01G1174400;MD14G1002500;MD01G1219500;MD07G1290500;MD03G1168700;MD16G1010800;MD14G1238700;MD00G1095400;MD11G1070800;MD08G1092600;MD15G1077000	K00261+K00261+K00261+K00264+K00264+K00830+K01580+K01915+K01953+K01953+K13051+K13051	12	https:\\www.genome.jp\dbget-bin\www_bget?map00250
ko00908	Zeatin biosynthesis	5/77	10/342	0.0497776	1	pmb0981;pme3007;pme2117;Zmfn000481;pmb2922	C00020+C00015+C00008+C00190+C00029	5	10/755	101/16855	0.0150169	1	MD02G1297600;MD07G1026600;novel.2896;MD01G1202600;MD01G1143100;MD03G1082100;MD07G1208400;MD07G1208900;MD07G1209200;MD14G1076500	K00279+K00279+K00279+K10717+K13493+K13493+K13493+K13493+K13493+K13495	10	https:\\www.genome.jp\dbget-bin\www_bget?map00908
ko00053	Ascorbate and aldarate metabolism	3/77	11/342	0.466823	1	pme2253;Zmpn000199;pmb2922	C01040+C00879+C00029	3	15/755	194/16855	0.0282733	1	MD07G1157900;MD07G1158000;MD15G1137200;MD04G1083900;MD05G1229100;MD11G1182500;MD16G1007900;MD09G1030800;novel.629;MD05G1359400;MD10G1334900;MD10G1252600;MD11G1211800;MD13G1231200;MD16G1012000	K00103+K00103+K00128+K00423+K00423+K00423+K00469+K08232+K08679+K10047+K10047+K14190+K14190+K17744+K19642	15	https:\\www.genome.jp\dbget-bin\www_bget?map00053
ko00380	Tryptophan metabolism	1/77	12/342	0.955778	1	pme1216	C10164	1	15/755	225/16855	0.0814019	1	MD15G1137200;MD10G1120200;MD01G1121000;MD00G1056000;MD08G1222800;MD07G1161100;MD07G1301000;MD06G1169600;MD05G1127900;MD16G1268000;MD16G1268200;MD06G1027500;MD06G1027800;MD11G1074400;MD15G1226200	K00128+K01426+K01593+K11816+K11868+K13066+K13066+K16903+K22588+K23947+K23947+K23947+K23947+K23947+K23947	15	https:\\www.genome.jp\dbget-bin\www_bget?map00380
ko00750	Vitamin B6 metabolism	2/77	4/342	0.219772	1	pme1383;Zmzn000079	C00314+C00279	2	4/755	37/16855	0.0821975	1	MD12G1166700;MD03G1113000;MD17G1175900;MD09G1195300	K06215+K08681+K13248+K13248	4	https:\\www.genome.jp\dbget-bin\www_bget?map00750
ko00944	Flavone and flavonol biosynthesis	3/77	15/342	0.695632	1	MWS20143;MWSHY0029;mws0913	C01514+C00389+C12626	3	4/755	39/16855	0.0955993	1	MD14G1210700;MD17G1060500;MD17G1060600;MD17G1071300	K05280+K13264+K13264+K13264	4	https:\\www.genome.jp\dbget-bin\www_bget?map00944
ko00480	Glutathione metabolism	3/77	8/342	0.259299	1	pme2292;mws4134;pme2651	C00134+C00127+C00006	3	15/755	237/16855	0.112902	1	MD16G1123600;MD04G1016000;MD07G1291100;MD17G1133800;MD03G1283000;MD04G1139500;MD05G1211000;MD06G1192100;MD12G1155200;MD13G1081900;MD16G1011600;MD03G1264800;MD07G1097400;novel.349;MD12G1028800	K00036+K00036+K00797+K00799+K00799+K00799+K00799+K00799+K00799+K00799+K00799+K01255+K01255+K01255+K18592	15	https:\\www.genome.jp\dbget-bin\www_bget?map00480
ko00290	Valine, leucine and isoleucine biosynthesis	1/77	11/342	0.942372	1	Lmbn001288	C06010	1	4/755	43/16855	0.125207	1	MD05G1110500;MD08G1075600;MD15G1063100;MD02G1002700	K00826+K00826+K00826+K01653	4	https:\\www.genome.jp\dbget-bin\www_bget?map00290
ko00780	Biotin metabolism	1/77	3/342	0.53597	1	Zmjn001813	C02656	1	4/755	45/16855	0.141293	1	MD10G1132600;MD14G1002100;MD09G1177500;MD09G1177600	K00059+K00059+K09458+K09458	4	https:\\www.genome.jp\dbget-bin\www_bget?map00780
ko00710	Carbon fixation in photosynthetic organisms	6/77	9/342	0.00515002	0.350201	mws0219;mws2125;Zmzn000078;Zmgn000447;Zmzn000079;MWS2442	C00049+C00074+C00111+C00197+C00279+C00085	6	12/755	196/16855	0.170186	1	MD02G1243100;MD13G1111300;MD06G1023500;MD01G1146300;MD11G1261900;MD13G1049200;MD17G1244400;MD01G1046200;MD00G1040000;MD10G1063600;MD15G1365300;MD09G1000800	K00051+K00134+K00855+K01100+K01595+K01595+K01602+K01610+K01623+K01623+K03841+K05298	12	https:\\www.genome.jp\dbget-bin\www_bget?map00710
ko02010	ABC transporters	3/77	44/342	0.999299	1	pme2292;mws0219;pme1119	C00134+C00049+C00294	3	13/755	220/16855	0.188964	1	MD16G1134500;MD16G1135100;MD17G1049600;MD01G1232000;MD01G1232100;MD04G1132400;MD11G1272000;MD15G1196000;MD01G1213600;MD11G1185400;MD11G1260200;MD14G1044500;MD11G1159100	K05658+K05658+K05658+K05658+K05658+K05658+K05658+K05658+K05666+K05681+K05681+K05681+K08711	13	https:\\www.genome.jp\dbget-bin\www_bget?map02010
ko00650	Butanoate metabolism	1/77	8/342	0.873162	1	Lmbn001288	C06010	1	4/755	51/16855	0.193873	1	MD16G1010800;MD12G1096100;MD14G1089800;MD02G1002700	K01580+K01640+K01640+K01653	4	https:\\www.genome.jp\dbget-bin\www_bget?map00650
ko00565	Ether lipid metabolism	1/77	1/342	0.225146	1	mws0120	C00670	1	5/755	70/16855	0.204131	1	MD07G1077500;MD04G1197500;MD12G1210300;MD15G1006400;MD02G1189900	K01114+K01115+K01115+K01115+K06123	5	https:\\www.genome.jp\dbget-bin\www_bget?map00565
ko00270	Cysteine and methionine metabolism	2/77	12/342	0.794906	1	mws0219;Zmgn000447	C00049+C00197	2	14/755	252/16855	0.240877	1	MD16G1010900;MD09G1157900;MD11G1012700;MD11G1202100;MD17G1156300;MD12G1201100;MD07G1291100;MD05G1110500;MD08G1075600;MD15G1063100;MD11G1108600;MD09G1204500;MD10G1328100;MD01G1070400	K00016+K00058+K00558+K00640+K00789+K00789+K00797+K00826+K00826+K00826+K01761+K05933+K05933+K20772	14	https:\\www.genome.jp\dbget-bin\www_bget?map00270
ko00960	Tropane, piperidine and pyridine alkaloid biosynthesis	2/77	10/342	0.699295	1	pme2292;pme0490	C00134+C00253	2	5/755	79/16855	0.279587	1	MD02G1257400;MD04G1135300;MD11G1093500;MD12G1148400;MD12G1148500	K00276+K08081+K08081+K08081+K08081	5	https:\\www.genome.jp\dbget-bin\www_bget?map00960
ko00500	Starch and sucrose metabolism	6/77	9/342	0.00515002	0.350201	MWS2442;mws0866;mws1090;Zmyn000083;mws2523;pmb2922	C00085+C00092+C00103+C01231+C00689+C00029	6	41/755	836/16855	0.294448	1	MD08G1156600;MD13G1056800;MD02G1044300;MD02G1063200;MD05G1100200;MD07G1261600;MD11G1307000;MD10G1002500;MD13G1285500;MD09G1255300;MD09G1278300;MD17G1122400;MD14G1059400;MD07G1152700;MD11G1196000;MD15G1365900;MD05G1081100;MD05G1338700;MD08G1101700;MD16G1175300;MD04G1056200;MD16G1104600;MD03G1291200;MD06G1091600;MD10G1003400;novel.2703;MD00G1190900;MD03G1215300;MD05G1105800;MD05G1105900;MD12G121150…	K00688+K00688+K00695+K00695+K00695+K00695+K00695+K00696+K00703+K00847+K00963+K00975+K00975+K01087+K01087+K01087+K01176+K01176+K01176+K01177+K01177+K01179+K01179+K01179+K01179+K01179+K01188+K01188+K01188+K01188+K01188+K01188+K01193+K01193+K19891+K19891+K19891+K19891+K19891+K19891+K19891	41	https:\\www.genome.jp\dbget-bin\www_bget?map00500
ko01200	Carbon metabolism	6/77	20/342	0.280786	1	mws0219;mws2125;Zmzn000078;Zmgn000447;Zmzn000079;MWS2442	C00049+C00074+C00111+C00197+C00279+C00085	6	32/755	649/16855	0.3117	1	MD16G1123600;MD04G1016000;MD02G1243100;MD09G1157900;MD01G1238700;MD17G1034800;MD15G1154800;MD13G1111300;MD00G1175600;MD01G1174400;MD14G1002500;MD11G1202100;MD03G1168700;MD17G1180700;MD06G1023500;MD02G1244000;MD01G1146300;MD00G1015600;MD00G1015700;MD11G1261900;MD13G1049200;MD17G1244400;MD01G1046200;MD00G1040000;MD10G1063600;MD06G1147700;MD03G1292300;MD15G1364700;MD15G1365300;MD09G1000800;MD10G1195…	K00036+K00036+K00051+K00058+K00121+K00122+K00131+K00134+K00261+K00261+K00261+K00640+K00830+K00850+K00855+K00873+K01100+K01455+K01455+K01595+K01595+K01602+K01610+K01623+K01623+K01638+K01679+K01834+K03841+K05298+K11517+K15893	32	https:\\www.genome.jp\dbget-bin\www_bget?map01200
ko00030	Pentose phosphate pathway	4/77	7/342	0.0480661	1	Zmgn000447;Zmzn000079;pmb2507;mws0863	C00197+C00279+C00672+C00673	4	8/755	148/16855	0.344692	1	MD16G1123600;MD04G1016000;MD15G1154800;MD17G1180700;MD05G1354800;MD00G1040000;MD10G1063600;MD15G1365300	K00036+K00036+K00131+K00850+K00895+K01623+K01623+K03841	8	https:\\www.genome.jp\dbget-bin\www_bget?map00030
ko00770	Pantothenate and CoA biosynthesis	3/77	8/342	0.259299	1	Lmbn001288;Lmgn000160;mws0219	C06010+C02642+C00049	3	5/755	87/16855	0.350484	1	MD15G1137200;MD05G1110500;MD08G1075600;MD15G1063100;MD02G1002700	K00128+K00826+K00826+K00826+K01653	5	https:\\www.genome.jp\dbget-bin\www_bget?map00770
ko00630	Glyoxylate and dicarboxylate metabolism	1/77	10/342	0.92497	1	Zmgn000447	C00197	1	11/755	213/16855	0.358004	1	MD17G1034800;MD03G1168700;MD00G1015600;MD00G1015700;MD17G1244400;MD06G1147700;MD14G1238700;MD10G1195700;MD05G1122100;MD03G1026600;MD03G1234300	K00122+K00830+K01455+K01455+K01602+K01638+K01915+K11517+K15893+K22133+K22133	11	https:\\www.genome.jp\dbget-bin\www_bget?map00630
ko00195	Photosynthesis	2/77	2/342	0.0501792	1	pme2117;pme2651	C00008+C00006	2	7/755	130/16855	0.364497	1	MD10G1321500;MD09G1098300;MD15G1006300;MD00G1075500;MD02G1130800;MD16G1191400;MD15G1441800	K02115+K02636+K02638+K02639+K02641+K02692+K02701	7	https:\\www.genome.jp\dbget-bin\www_bget?map00195
ko00051	Fructose and mannose metabolism	2/77	5/342	0.314569	1	Zmzn000078;Zmpn000095	C00111+C01096	2	10/755	201/16855	0.413014	1	MD01G1110100;MD01G1195200;MD01G1195400;MD07G1261900;MD09G1255300;MD17G1180700;MD05G1354800;MD00G1040000;MD10G1063600;MD15G1365300	K00008+K00008+K00008+K00008+K00847+K00850+K00895+K01623+K01623+K03841	10	https:\\www.genome.jp\dbget-bin\www_bget?map00051
ko00520	Amino sugar and nucleotide sugar metabolism	6/77	12/342	0.0313127	1	mws4174;Zmyn000110;mws1090;Zmfn000481;pmb2922;Lmqn000780	C00645+C06156+C00103+C00190+C00029+C00043	6	19/755	404/16855	0.447056	1	MD09G1255300;MD09G1278300;MD17G1122400;MD14G1059400;MD01G1213300;MD02G1011100;MD02G1011200;MD04G1047700;MD04G1048000;MD14G1206900;MD15G1156100;MD15G1058400;MD01G1125200;novel.629;MD17G1127400;MD05G1287500;MD16G1158100;MD02G1120200;MD04G1029400	K00847+K00963+K00975+K00975+K01183+K01183+K01183+K01183+K01183+K01183+K01183+K06118+K08678+K08679+K12448+K15920+K20547+K20547+K20547	19	https:\\www.genome.jp\dbget-bin\www_bget?map00520
ko00220	Arginine biosynthesis	4/77	10/342	0.166179	1	mws0219;pme0008;pme0075;pmb2657	C00049+C00327+C00624+C03406	4	5/755	101/16855	0.475026	1	MD00G1175600;MD01G1174400;MD14G1002500;MD14G1238700;MD10G1142400	K00261+K00261+K00261+K01915+K14677	5	https:\\www.genome.jp\dbget-bin\www_bget?map00220
ko00592	alpha-Linolenic acid metabolism	1/77	9/342	0.902403	1	Zmyn004732	C16342	1	8/755	171/16855	0.501277	1	MD08G1216100;MD15G1401800;MD17G1100800;MD09G1071400;MD02G1172900;MD15G1081200;MD04G1247600;MD12G1262800	K05894+K05894+K10528+K10528+K16818+K16818+K22389+K22389	8	https:\\www.genome.jp\dbget-bin\www_bget?map00592
ko00260	Glycine, serine and threonine metabolism	3/77	11/342	0.466823	1	ML10197929;mws0219;Zmgn000447	C00300+C00049+C00197	3	8/755	173/16855	0.514538	1	MD09G1157900;MD16G1071800;MD13G1071000;MD02G1257400;MD08G1126500;MD03G1168700;MD15G1364700;MD05G1122100	K00058+K00108+K00108+K00276+K00306+K00830+K01834+K15893	8	https:\\www.genome.jp\dbget-bin\www_bget?map00260
ko00040	Pentose and glucuronate interconversions	3/77	11/342	0.466823	1	Zmzn000078;mws1090;pmb2922	C00111+C00103+C00029	3	19/755	423/16855	0.528817	1	MD01G1110100;MD01G1195200;MD01G1195400;MD07G1261900;MD09G1278300;MD02G1207900;MD04G1008100;MD07G1255000;MD09G1172600;MD11G1195400;MD12G1018900;MD03G1110300;MD09G1030100;MD09G1030200;MD12G1077600;MD16G1097700;MD17G1279500;MD13G1094200;MD13G1231000	K00008+K00008+K00008+K00008+K00963+K01051+K01051+K01051+K01051+K01051+K01051+K01184+K01184+K01184+K01184+K01213+K01213+K01213+K01728	19	https:\\www.genome.jp\dbget-bin\www_bget?map00040
ko00660	C5-Branched dibasic acid metabolism	2/77	10/342	0.699295	1	Lmbn001288;pme3009	C06010+C02341	2	1/755	19/16855	0.581555	1	MD02G1002700	K01653	1	https:\\www.genome.jp\dbget-bin\www_bget?map00660
ko00562	Inositol phosphate metabolism	2/77	4/342	0.219772	1	Zmzn000078;mws0866	C00111+C00092	2	10/755	234/16855	0.605953	1	MD16G1007900;MD00G1031200;MD05G1107600;MD05G1107700;MD16G1029100;MD07G1077500;MD00G1087100;MD15G1070600;MD05G1359400;MD10G1334900	K00469+K00913+K00913+K00913+K00921+K01114+K01765+K05857+K10047+K10047	10	https:\\www.genome.jp\dbget-bin\www_bget?map00562
ko00620	Pyruvate metabolism	1/77	6/342	0.786344	1	mws2125	C00074	1	11/755	265/16855	0.645224	1	MD16G1010900;MD02G1243100;MD01G1238700;MD15G1137200;MD02G1244000;MD11G1261900;MD13G1049200;MD01G1046200;MD06G1147700;MD03G1292300;MD01G1073700	K00016+K00051+K00121+K00128+K00873+K01595+K01595+K01610+K01638+K01679+K01759	11	https:\\www.genome.jp\dbget-bin\www_bget?map00620
ko00010	Glycolysis / Gluconeogenesis	5/77	7/342	0.00740996	0.503877	mws2125;Zmzn000078;Zmgn000447;mws1090;mws1521	C00074+C00111+C00197+C00103+C01451	5	14/755	355/16855	0.72551	1	MD16G1010900;MD01G1238700;MD15G1137200;MD15G1154800;MD13G1111300;MD17G1180700;MD02G1244000;MD05G1354800;MD04G1160100;MD01G1046200;MD00G1040000;MD10G1063600;MD15G1364700;MD15G1365300	K00016+K00121+K00128+K00131+K00134+K00850+K00873+K00895+K01568+K01610+K01623+K01623+K01834+K03841	14	https:\\www.genome.jp\dbget-bin\www_bget?map00010
ko00730	Thiamine metabolism	1/77	5/342	0.723069	1	pmb0530	C00003	1	2/755	58/16855	0.739813	1	MD06G1144200;MD11G1224800	K00939+K03146	2	https:\\www.genome.jp\dbget-bin\www_bget?map00730
ko01210	2-Oxocarboxylic acid metabolism	3/77	26/342	0.9585	1	Lmbn001288;mws0219;pme0075	C06010+C00049+C00624	3	5/755	139/16855	0.751537	1	MD05G1110500;MD08G1075600;MD15G1063100;MD02G1002700;MD10G1142400	K00826+K00826+K00826+K01653+K14677	5	https:\\www.genome.jp\dbget-bin\www_bget?map01210
ko00240	Pyrimidine metabolism	6/77	18/342	0.196504	1	Lmgn000160;pmb2507;MWSslk257;pme3188;pme3007;pmb2922	C02642+C00672+C00055+C00105+C00015+C00029	6	6/755	165/16855	0.753952	1	MD16G1178800;MD15G1031300;MD00G1085100;MD10G1221000;MD16G1192900;MD07G1087100	K01510+K01520+K01937+K01937+K03787+K13800	6	https:\\www.genome.jp\dbget-bin\www_bget?map00240
ko00300	Lysine biosynthesis	2/77	6/342	0.406694	1	mws0219;pme0278	C00049+C00666	2	1/755	32/16855	0.769587	1	MD08G1221500	K10206	1	https:\\www.genome.jp\dbget-bin\www_bget?map00300
ko00350	Tyrosine metabolism	1/77	12/342	0.955778	1	MWSmce580	C05585	1	5/755	146/16855	0.788348	1	MD01G1238700;MD02G1257400;MD17G1134800;MD01G1121000;MD04G1166700	K00121+K00276+K00457+K01593+K07253	5	https:\\www.genome.jp\dbget-bin\www_bget?map00350
ko01230	Biosynthesis of amino acids	11/77	43/342	0.365642	1	Lmbn001288;mws0001;mws0219;mws2125;Zmzn000078;pme0008;Zmgn000447;pme0075;pme0278;Zmzn000079;pmb2657	C06010+C00152+C00049+C00074+C00111+C00327+C00197+C00624+C00666+C00279+C03406	11	22/755	574/16855	0.804514	1	MD09G1157900;MD13G1111300;MD01G1219500;MD07G1290500;MD11G1202100;MD17G1156300;MD12G1201100;MD05G1110500;MD08G1075600;MD15G1063100;MD17G1180700;MD02G1244000;MD00G1040000;MD10G1063600;MD02G1002700;MD11G1078000;MD15G1364700;MD14G1238700;MD00G1095400;MD11G1070800;MD08G1221500;MD10G1142400	K00058+K00134+K00264+K00264+K00640+K00789+K00789+K00826+K00826+K00826+K00850+K00873+K01623+K01623+K01653+K01657+K01834+K01915+K01953+K01953+K10206+K14677	22	https:\\www.genome.jp\dbget-bin\www_bget?map01230
ko01040	Biosynthesis of unsaturated fatty acids	1/77	6/342	0.786344	1	mws0397	C06428	1	2/755	76/16855	0.86041	1	MD13G1107000;MD01G1038800	K10251+K10703	2	https:\\www.genome.jp\dbget-bin\www_bget?map01040
ko00052	Galactose metabolism	5/77	18/342	0.38072	1	Zmzn000078;MWS2442;mws1090;pmb2922;Lmqn000213	C00111+C00085+C00103+C00029+C01613	5	9/755	272/16855	0.864577	1	MD17G1180700;MD09G1278300;MD11G1195800;MD12G1028200;MD02G1079200;MD03G1128200;MD11G1133100;MD12G1120300;MD13G1093700	K00850+K00963+K01193+K01193+K12309+K12309+K12309+K12309+K18819	9	https:\\www.genome.jp\dbget-bin\www_bget?map00052
ko00330	Arginine and proline metabolism	2/77	18/342	0.941656	1	pme2292;ML10197929	C00134+C00300	2	4/755	141/16855	0.881574	1	MD15G1137200;MD07G1291100;MD10G1120200;MD05G1055300	K00128+K00797+K01426+K01583	4	https:\\www.genome.jp\dbget-bin\www_bget?map00330
ko00410	beta-Alanine metabolism	3/77	11/342	0.466823	1	MWS2413;Lmgn000160;mws0219	C01073+C02642+C00049	3	3/755	114/16855	0.890394	1	MD15G1137200;MD02G1257400;MD16G1010800	K00128+K00276+K01580	3	https:\\www.genome.jp\dbget-bin\www_bget?map00410
ko00340	Histidine metabolism	1/77	10/342	0.92497	1	mws0219	C00049	1	1/755	49/16855	0.89448	1	MD15G1137200	K00128	1	https:\\www.genome.jp\dbget-bin\www_bget?map00340
ko00591	Linoleic acid metabolism	6/77	13/342	0.0477919	1	Lmbn005923;Lmbn006152;pmb2787;Lmbn005287;Lmbn005487;Lmbn003970	C07289+C04056+C14766+C07354+C14829+C14833	6	1/755	50/16855	0.89922	1	MD04G1204500	K15718	1	https:\\www.genome.jp\dbget-bin\www_bget?map00591
ko00640	Propanoate metabolism	1/77	3/342	0.53597	1	Zmzn000078	C00111	1	2/755	88/16855	0.90971	1	MD16G1010900;MD15G1133900	K00016+K00166	2	https:\\www.genome.jp\dbget-bin\www_bget?map00640
ko00310	Lysine degradation	1/77	11/342	0.942372	1	pme0122	C02727	1	2/755	92/16855	0.922142	1	MD15G1137200;MD08G1126500	K00128+K00306	2	https:\\www.genome.jp\dbget-bin\www_bget?map00310
ko00760	Nicotinate and nicotinamide metabolism	7/77	14/342	0.0197922	1	pme0490;mws0219;pme2268;Zmzn000078;mws0675;pmb0530;pme2651	C00253+C00049+C01004+C00111+C00455+C00003+C00006	7	1/755	68/16855	0.95596	1	MD16G1192900	K03787	1	https:\\www.genome.jp\dbget-bin\www_bget?map00760
ko00230	Purine metabolism	5/77	20/342	0.48226	1	pme1119;mws0874;pmb0981;pmb0532;pme2117	C00294+C01367+C00020+C00130+C00008	5	7/755	289/16855	0.976547	1	MD08G1086300;MD02G1244000;MD06G1144200;MD05G1314100;MD00G1061700;MD16G1178800;MD16G1192900	K00759+K00873+K00939+K01466+K01490+K01510+K03787	7	https:\\www.genome.jp\dbget-bin\www_bget?map00230
ko00020	Citrate cycle (TCA cycle)	1/77	7/342	0.835307	1	mws2125	C00074	1	2/755	144/16855	0.989665	1	MD01G1046200;MD03G1292300	K01610+K01679	2	https:\\www.genome.jp\dbget-bin\www_bget?map00020
ko00190	Oxidative phosphorylation	3/77	5/342	0.0775771	1	pme2117;MWS5083;pmb0530	C00008+C00061+C00003	3	6/755	290/16855	0.990866	1	MD04G1120600;MD12G1137900;MD08G1130200;MD10G1321500;MD13G1148300;novel.2108	K01507+K01507+K01535+K02115+K03884+K05573	6	https:\\www.genome.jp\dbget-bin\www_bget?map00190
ko00970	Aminoacyl-tRNA biosynthesis	2/77	18/342	0.941656	1	mws0001;mws0219	C00152+C00049	2	4/755	228/16855	0.992474	1	MD07G1030400;MD13G1169000;MD02G1140800;MD10G1070400	K01870+K01872+K02433+K02433	4	https:\\www.genome.jp\dbget-bin\www_bget?map00970
ko00400	Phenylalanine, tyrosine and tryptophan biosynthesis	2/77	10/342	0.699295	1	mws2125;Zmzn000079	C00074+C00279	2	1/755	116/16855	0.995179	1	MD11G1078000	K01657	1	https:\\www.genome.jp\dbget-bin\www_bget?map00400

## Sheet: NNNP vs LNNP
KEGG_map	Description	DiffRatio_meta	BgRatio_meta	P-value_meta	Adjusted P-value_meta	Index_meta	CID_meta	Count_meta	DiffRatio_gene	BgRatio_gene	P-value_gene	Adjusted P-value_gene	Index_gene	KO_gene	Count_gene	Hyperlink
ko01100	Metabolic pathways	51/62	259/341	0.130157	1	pme2292;mws0255;pme2122;mws0177;mws0491;pme1216;pme0490;Lmbn001288;pme0040;pme0033;MWSmce580;pmb0764;pme0295;mws0017;MWS20194;Zmyn002323;Zmjn001813;mws0159;mws2125;mws0154;pmb3101;Lmbn001754;pmf0138;mws0214;mws1155;pme2237;pme0075;pme0278;mws0597;pme3705;mws4174;pme1194;pme3961;Zmpn000095;pme1184;pme1119;MWSHY0017;pme2960;pmb0508;MWS20143;mws0064;mws2367;MWSHY0029;mws0369;pme1373;pmb2221;Zmyn0000…	C00134+C00380+C00388+C01546+C05332+C10164+C00253+C06010+C00147+C00262+C05585+C04294+C02946+C00315+C00423+C05852+C02656+C00166+C00074+C00493+C02504+C04411+C00159+C00794+C00392+C01697+C00624+C00666+C05635+C00191+C00645+C00881+C00559+C01096+C00330+C00294+C00509+C06561+C04498+C01514+C05631+C06046+C00389+C00219+C00239+C12144+C01231+C00354+C00144+C00255+C01613	51	561/1082	7083/16855	1.09996e-11	1.38595e-09	MD06G1121600;MD13G1009500;MD01G1110100;MD05G1042900;MD08G1186000;MD08G1186300;MD15G1372400;MD06G1193800;MD08G1111500;MD14G1117900;MD14G1118000;MD16G1123600;MD04G1016000;MD09G1126100;MD13G1122800;MD02G1243100;novel.2293;MD14G1002100;MD17G1119800;MD17G1119900;MD07G1183600;MD13G1280800;MD15G1008100;MD07G1157900;MD15G1095800;MD17G1034800;MD15G1137200;MD14G1187300;MD13G1019500;novel.656;MD16G1111100;M…	K00001+K00002+K00008+K00020+K00020+K00020+K00020+K00026+K00029+K00033+K00033+K00036+K00036+K00036+K00036+K00051+K00058+K00059+K00083+K00083+K00083+K00083+K00083+K00103+K00103+K00122+K00128+K00130+K00133+K00133+K00134+K00134+K00166+K00218+K00218+K00218+K00228+K00261+K00261+K00264+K00264+K00294+K00294+K00306+K00307+K00366+K00366+K00422+K00422+K00423+K00430+K00430+K00430+K00430+K00430+K00430+K00430+…	561	https:\\www.genome.jp\dbget-bin\www_bget?map01100
ko01110	Biosynthesis of secondary metabolites	21/62	132/341	0.843519	1	pme2292;pme2122;pme0490;Lmbn001288;MWS20194;mws0159;mws2125;mws0154;pmb3101;Lmbn001754;pme0075;pme0278;MWSHY0017;pme2960;pme1201;MWS20143;mws0064;MWSHY0029;pmn001689;pme3311;mws0232	C00134+C00388+C00253+C06010+C00423+C00166+C00074+C00493+C02504+C04411+C00624+C00666+C00509+C06561+C00774+C01514+C05631+C00389+C21924+C00354+C00255	21	358/1082	4040/16855	1.58167e-11	1.9929e-09	MD06G1121600;MD13G1009500;MD07G1234300;MD12G1082400;MD14G1077200;MD06G1193800;MD14G1117900;MD14G1118000;MD16G1123600;MD04G1016000;MD09G1126100;MD13G1122800;novel.2293;MD14G1002100;MD17G1119800;MD17G1119900;MD07G1183600;MD13G1280800;MD15G1008100;MD15G1137200;MD13G1019500;novel.656;MD16G1111100;MD10G1210900;MD15G1133900;MD03G1223800;MD03G1223900;MD11G1241700;MD10G1157000;MD09G1144600;MD01G1219500;M…	K00001+K00002+K00006+K00006+K00006+K00026+K00033+K00033+K00036+K00036+K00036+K00036+K00058+K00059+K00083+K00083+K00083+K00083+K00083+K00128+K00133+K00133+K00134+K00134+K00166+K00218+K00218+K00218+K00224+K00228+K00264+K00264+K00307+K00422+K00422+K00430+K00430+K00430+K00430+K00430+K00430+K00430+K00430+K00430+K00430+K00430+K00430+K00430+K00430+K00430+K00430+K00430+K00430+K00430+K00430+K00430+K00430+…	358	https:\\www.genome.jp\dbget-bin\www_bget?map01110
ko00940	Phenylpropanoid biosynthesis	3/62	25/341	0.868184	1	mws0017;MWS20194;pmp001214	C00315+C00423+C00933	3	71/1082	616/16855	1.05832e-06	0.000133348	MD17G1119800;MD17G1119900;MD07G1183600;MD13G1280800;MD15G1008100;MD16G1052000;MD00G1088400;MD00G1112500;MD01G1162700;MD02G1124700;MD03G1013200;MD03G1013600;MD03G1014200;MD04G1101700;MD04G1170900;MD05G1075100;MD05G1306500;MD06G1038800;MD08G1230900;MD09G1010000;MD09G1105900;MD10G1218200;MD11G1004100;MD11G1015400;MD13G1011000;MD13G1011200;MD13G1053000;MD14G1010300;MD15G1238800;MD15G1294200;MD15G1321…	K00083+K00083+K00083+K00083+K00083+K00430+K00430+K00430+K00430+K00430+K00430+K00430+K00430+K00430+K00430+K00430+K00430+K00430+K00430+K00430+K00430+K00430+K00430+K00430+K00430+K00430+K00430+K00430+K00430+K00430+K00430+K00487+K01188+K01188+K01188+K01188+K01188+K01904+K05350+K05350+K09753+K09753+K09753+K09753+K09753+K09753+K09753+K12355+K12355+K12356+K12356+K12356+K13065+K13065+K13065+K13065+K13065+…	71	https:\\www.genome.jp\dbget-bin\www_bget?map00940
ko00480	Glutathione metabolism	2/62	8/341	0.443411	1	pme2292;mws0017	C00134+C00315	2	34/1082	237/16855	8.62379e-06	0.0010866	MD14G1117900;MD14G1118000;MD16G1123600;MD04G1016000;MD09G1126100;MD13G1122800;MD04G1034400;MD14G1103300;MD02G1127800;MD07G1292400;MD17G1133800;MD17G1134300;MD17G1267400;MD17G1267600;MD02G1236000;MD02G1236100;MD04G1139400;MD04G1139600;MD05G1184300;MD05G1184400;MD05G1184600;MD05G1210000;MD05G1210400;MD05G1210600;MD05G1211000;MD05G1211100;MD06G1192100;MD10G1172100;MD10G1172300;MD10G1196900;MD14G1232…	K00033+K00033+K00036+K00036+K00036+K00036+K00432+K00432+K00434+K00797+K00799+K00799+K00799+K00799+K00799+K00799+K00799+K00799+K00799+K00799+K00799+K00799+K00799+K00799+K00799+K00799+K00799+K00799+K00799+K00799+K00799+K00799+K01255+K10808	34	https:\\www.genome.jp\dbget-bin\www_bget?map00480
ko00010	Glycolysis / Gluconeogenesis	1/62	6/341	0.702969	1	mws2125	C00074	1	37/1082	355/16855	0.00249669	0.314582	MD06G1121600;MD13G1009500;MD15G1137200;MD16G1111100;MD10G1210900;novel.2496;MD15G1012900;MD17G1180600;MD05G1242500;MD08G1109700;MD10G1224300;MD12G1020200;MD14G1017400;MD11G1001400;MD11G1001600;MD14G1094200;MD05G1354800;MD06G1002300;MD10G1210600;MD04G1159900;MD04G1160100;MD12G1172400;MD12G1172500;MD12G1173200;MD00G1040000;MD10G1063600;MD12G1018700;MD06G1189800;MD17G1023600;MD08G1034600;MD15G136470…	K00001+K00002+K00128+K00134+K00134+K00627+K00844+K00850+K00850+K00850+K00850+K00850+K00850+K00873+K00873+K00873+K00895+K00895+K00927+K01568+K01568+K01568+K01568+K01568+K01623+K01623+K01623+K01785+K01792+K01810+K01834+K18857+K18857+K18857+K18857+K18857+K18857	37	https:\\www.genome.jp\dbget-bin\www_bget?map00010
ko00943	Isoflavonoid biosynthesis	1/62	1/341	0.181818	1	MWSHY0017	C00509	1	13/1082	85/16855	0.00288528	0.363545	MD16G1188500;MD02G1276600;MD05G1191000;MD03G1281500;MD17G1060600;MD17G1060800;MD17G1071300;MD09G1080400;MD05G1117300;MD09G1070400;MD09G1111300;MD11G1306400;MD14G1052500	K13258+K13258+K13258+K13260+K13264+K13264+K13264+K13264+K25075+K25075+K25075+K25075+K25075	13	https:\\www.genome.jp\dbget-bin\www_bget?map00943
ko00300	Lysine biosynthesis	1/62	6/341	0.702969	1	pme0278	C00666	1	7/1082	32/16855	0.00359224	0.452622	MD13G1019500;novel.656;MD09G1003700;MD08G1175700;MD08G1221500;novel.1498;novel.1499	K00133+K00133+K00928+K10206+K10206+K10206+K10206	7	https:\\www.genome.jp\dbget-bin\www_bget?map00300
ko00052	Galactose metabolism	4/62	18/341	0.419891	1	pmf0138;mws0214;pme2237;Lmqn000213	C00159+C00794+C01697+C01613	4	29/1082	272/16855	0.005045	0.635671	MD15G1012900;MD17G1180600;MD05G1242500;MD08G1109700;MD10G1224300;MD12G1020200;MD14G1017400;MD10G1240300;MD17G1014300;MD08G1146300;MD15G1122100;MD15G1122400;MD06G1108600;MD06G1189800;MD09G1161700;MD14G1070200;MD14G1070300;MD02G1079200;MD03G1114300;MD03G1114800;MD03G1128200;MD03G1258200;MD05G1040600;MD11G1133400;MD11G1278800;MD12G1120300;MD15G1029700;MD04G1190900;MD13G1093700	K00844+K00850+K00850+K00850+K00850+K00850+K00850+K01187+K01193+K01193+K01193+K01193+K01784+K01785+K06617+K06617+K06617+K12309+K12309+K12309+K12309+K12309+K12309+K12309+K12309+K12309+K12309+K18819+K18819	29	https:\\www.genome.jp\dbget-bin\www_bget?map00052
ko00908	Zeatin biosynthesis	1/62	10/341	0.869535	1	pme0040	C00147	1	14/1082	101/16855	0.00507675	0.63967	MD02G1297600;MD07G1026600;MD08G1023900;MD15G1050100;MD17G1076700;MD09G1087700;MD13G1182800;MD03G1081900;MD07G1208400;MD07G1208900;MD07G1209200;MD14G1076500;MD12G1104800;MD12G1156200	K00279+K00279+K00279+K00279+K10717+K10717+K10760+K13493+K13493+K13493+K13493+K13495+K13496+K23452	14	https:\\www.genome.jp\dbget-bin\www_bget?map00908
ko00941	Flavonoid biosynthesis	8/62	27/341	0.0933357	1	mws0040;Lmyn006227;MWSHY0017;pme2960;pme1201;MWS20143;mws0064;MWSHY0029	C10028+C10044+C00509+C06561+C00774+C01514+C05631+C00389	8	23/1082	209/16855	0.00809021	1	MD03G1051400;MD04G1003400;MD05G1115000;MD13G1285100;MD03G1252100;MD05G1244500;MD07G1186300;MD07G1233400;MD03G1001100;MD04G1060700;MD01G1077400;MD16G1109100;MD02G1273000;MD04G1016900;MD07G1095200;MD09G1169600;MD09G1267700;MD10G1161400;MD10G1199500;MD14G1011900;MD15G1001600;MD02G1248100;MD16G1048500	K00487+K00660+K00660+K00660+K01859+K01859+K01859+K01859+K05277+K05278+K08695+K13065+K13065+K13065+K13065+K13065+K13065+K13065+K13065+K13065+K13065+K13080+K13081	23	https:\\www.genome.jp\dbget-bin\www_bget?map00941
ko02010	ABC transporters	10/62	44/341	0.258537	1	pme2292;mws0017;pmf0138;mws0214;mws1155;pme1194;pme3961;pme1184;pme1119;mws0232	C00134+C00315+C00159+C00794+C00392+C00881+C00559+C00330+C00294+C00255	10	22/1082	220/16855	0.025968	1	MD11G1124700;MD06G1189700;MD17G1042800;MD17G1284300;MD09G1041500;MD09G1041900;MD13G1170400;MD15G1196000;MD07G1084200;MD03G1188200;MD01G1210800;MD05G1042600;MD08G1001300;MD13G1027300;MD14G1044500;MD16G1137900;MD17G1184700;MD03G1136800;MD04G1187600;MD08G1141400;MD10G1175000;MD15G1117800	K05641+K05643+K05658+K05658+K05658+K05658+K05658+K05658+K05665+K05666+K05681+K05681+K05681+K05681+K05681+K08711+K08711+K08711+K08711+K08711+K08711+K08711	22	https:\\www.genome.jp\dbget-bin\www_bget?map02010
ko01200	Carbon metabolism	2/62	20/341	0.908389	1	mws2125;pme3311	C00074+C00354	2	53/1082	649/16855	0.0418968	1	MD06G1193800;MD08G1111500;MD14G1117900;MD14G1118000;MD16G1123600;MD04G1016000;MD09G1126100;MD13G1122800;MD02G1243100;novel.2293;MD17G1034800;MD16G1111100;MD10G1210900;MD01G1174400;MD14G1002500;novel.2496;MD15G1233400;MD17G1154300;MD15G1012900;MD17G1180600;MD05G1242500;MD08G1109700;MD10G1224300;MD12G1020200;MD14G1017400;MD06G1023500;MD11G1001400;MD11G1001600;MD14G1094200;MD10G1210600;MD13G1060200;…	K00026+K00029+K00033+K00033+K00036+K00036+K00036+K00036+K00051+K00058+K00122+K00134+K00134+K00261+K00261+K00627+K00640+K00814+K00844+K00850+K00850+K00850+K00850+K00850+K00850+K00855+K00873+K00873+K00873+K00927+K01057+K01100+K01455+K01455+K01595+K01595+K01595+K01602+K01602+K01623+K01623+K01623+K01638+K01738+K01810+K01834+K02160+K03781+K05298+K05605+K11517+K13034+K15893	53	https:\\www.genome.jp\dbget-bin\www_bget?map01200
ko00500	Starch and sucrose metabolism	1/62	9/341	0.839577	1	Zmyn000083	C01231	1	65/1082	836/16855	0.0613707	1	MD08G1156600;MD13G1056800;MD13G1123000;MD17G1287000;MD02G1100500;MD07G1261600;MD09G1024200;MD09G1280200;MD10G1072300;MD11G1307000;MD15G1223500;novel.389;MD17G1035000;MD15G1012900;MD04G1144400;MD06G1219200;MD12G1158400;MD09G1265400;MD12G1058400;MD14G1059400;MD07G1286100;MD09G1033100;MD15G1326700;MD15G1365900;MD01G1137600;MD05G1081100;MD08G1101700;MD12G1056500;MD10G1189300;MD16G1104600;MD06G1091600…	K00688+K00688+K00688+K00695+K00695+K00695+K00695+K00695+K00695+K00695+K00695+K00695+K00706+K00844+K00847+K00847+K00847+K00975+K00975+K00975+K01087+K01087+K01087+K01087+K01176+K01176+K01176+K01176+K01177+K01179+K01179+K01179+K01179+K01179+K01179+K01179+K01179+K01187+K01188+K01188+K01188+K01188+K01188+K01193+K01193+K01193+K01193+K01810+K05350+K05350+K16055+K19891+K19891+K19891+K19891+K19891+K19891+…	65	https:\\www.genome.jp\dbget-bin\www_bget?map00500
ko00710	Carbon fixation in photosynthetic organisms	2/62	9/341	0.509258	1	mws2125;pme3311	C00074+C00354	2	18/1082	196/16855	0.0798386	1	MD06G1193800;MD08G1111500;MD02G1243100;MD16G1111100;MD10G1210900;MD17G1154300;MD06G1023500;MD10G1210600;MD01G1146300;MD01G1160000;MD09G1237900;novel.1781;MD17G1244400;MD13G1252300;MD00G1040000;MD10G1063600;MD12G1018700;MD09G1000800	K00026+K00029+K00051+K00134+K00134+K00814+K00855+K00927+K01100+K01595+K01595+K01595+K01602+K01602+K01623+K01623+K01623+K05298	18	https:\\www.genome.jp\dbget-bin\www_bget?map00710
ko00592	alpha-Linolenic acid metabolism	1/62	9/341	0.839577	1	pmn001689	C21924	1	16/1082	171/16855	0.0832868	1	MD10G1157000;MD02G1317800;MD09G1180900;MD10G1085800;MD08G1216100;MD15G1402800;MD17G1100800;MD09G1071400;MD10G1282800;MD15G1081200;MD05G1013200;MD05G1013400;MD09G1211500;MD10G1013900;MD10G1014200;MD10G1014500	K00224+K00454+K00454+K01723+K05894+K05894+K10528+K10528+K16818+K16818+K18857+K18857+K18857+K18857+K18857+K18857	16	https:\\www.genome.jp\dbget-bin\www_bget?map00592
ko00944	Flavone and flavonol biosynthesis	3/62	15/341	0.534172	1	MWS20143;MWSHY0029;mws0913	C01514+C00389+C12626	3	5/1082	39/16855	0.102308	1	MD02G1248100;MD17G1060600;MD17G1060800;MD17G1071300;MD09G1080400	K13080+K13264+K13264+K13264+K13264	5	https:\\www.genome.jp\dbget-bin\www_bget?map00944
ko00330	Arginine and proline metabolism	4/62	19/341	0.465142	1	pme2292;pme0295;mws0017;pmb0508	C00134+C02946+C00315+C04498	4	13/1082	141/16855	0.119785	1	MD15G1137200;MD14G1195900;MD14G1196000;MD17G1044500;MD15G1007000;MD07G1292400;MD05G1281300;MD05G1117200;MD10G1120200;MD05G1055300;MD16G1180000;MD15G1206900;MD01G1140200	K00128+K00294+K00294+K00472+K00472+K00797+K00819+K01426+K01426+K01583+K01611+K12259+K12657	13	https:\\www.genome.jp\dbget-bin\www_bget?map00330
ko00051	Fructose and mannose metabolism	4/62	5/341	0.00434521	0.230296	pmf0138;mws0214;mws1155;Zmpn000095	C00159+C00794+C00392+C01096	4	17/1082	201/16855	0.148998	1	MD01G1110100;MD15G1012900;MD04G1144400;MD06G1219200;MD12G1158400;MD17G1180600;MD05G1242500;MD08G1109700;MD10G1224300;MD12G1020200;MD14G1017400;MD05G1354800;MD06G1002300;MD00G1040000;MD10G1063600;MD12G1018700;MD01G1177400	K00008+K00844+K00847+K00847+K00847+K00850+K00850+K00850+K00850+K00850+K00850+K00895+K00895+K01623+K01623+K01623+K01805	17	https:\\www.genome.jp\dbget-bin\www_bget?map00051
ko00620	Pyruvate metabolism	3/62	6/341	0.076069	1	mws2125;pmb3101;Zmgn001448	C00074+C02504+C05994	3	21/1082	265/16855	0.186665	1	MD06G1121600;MD13G1009500;MD06G1193800;MD08G1111500;MD02G1243100;MD15G1137200;novel.2496;MD11G1001400;MD11G1001600;MD14G1094200;MD01G1160000;MD09G1237900;novel.1781;MD06G1147700;MD10G1103400;MD05G1013200;MD05G1013400;MD09G1211500;MD10G1013900;MD10G1014200;MD10G1014500	K00001+K00002+K00026+K00029+K00051+K00128+K00627+K00873+K00873+K00873+K01595+K01595+K01595+K01638+K02160+K18857+K18857+K18857+K18857+K18857+K18857	21	https:\\www.genome.jp\dbget-bin\www_bget?map00620
ko01230	Biosynthesis of amino acids	8/62	43/341	0.54003	1	Lmbn001288;mws0159;mws2125;mws0154;pmb3101;Lmbn001754;pme0075;pme0278	C06010+C00166+C00074+C00493+C02504+C04411+C00624+C00666	8	42/1082	574/16855	0.207654	1	novel.2293;MD13G1019500;novel.656;MD16G1111100;MD10G1210900;MD01G1219500;MD07G1290500;MD15G1233400;MD17G1154300;MD08G1075600;MD15G1063100;MD17G1180600;MD05G1242500;MD08G1109700;MD10G1224300;MD12G1020200;MD14G1017400;MD11G1001400;MD11G1001600;MD14G1094200;MD10G1210600;MD09G1003700;MD06G1033100;MD12G1246700;MD00G1040000;MD10G1063600;MD12G1018700;MD12G1235500;MD15G1364700;MD13G1066600;MD09G1270600;M…	K00058+K00133+K00133+K00134+K00134+K00264+K00264+K00640+K00814+K00826+K00826+K00850+K00850+K00850+K00850+K00850+K00850+K00873+K00873+K00873+K00927+K00928+K01438+K01620+K01623+K01623+K01623+K01738+K01834+K01850+K01915+K01915+K01953+K01953+K01953+K10206+K10206+K10206+K10206+K12657+K13034+K14682	42	https:\\www.genome.jp\dbget-bin\www_bget?map01230
ko00350	Tyrosine metabolism	2/62	12/341	0.67485	1	MWSmce580;mws2367	C05585+C06046	2	12/1082	146/16855	0.228002	1	MD06G1121600;MD05G1318900;MD10G1298500;MD11G1255200;MD01G1121000;MD01G1121100;MD05G1013200;MD05G1013400;MD09G1211500;MD10G1013900;MD10G1014200;MD10G1014500	K00001+K00422+K00422+K00815+K01593+K01593+K18857+K18857+K18857+K18857+K18857+K18857	12	https:\\www.genome.jp\dbget-bin\www_bget?map00350
ko00960	Tropane, piperidine and pyridine alkaloid biosynthesis	3/62	10/341	0.266495	1	pme2292;pme0490;mws0159	C00134+C00253+C00166	3	7/1082	79/16855	0.243273	1	MD11G1255200;MD04G1134700;MD04G1135200;MD04G1135300;MD11G1093400;MD11G1093500;novel.337	K00815+K08081+K08081+K08081+K08081+K08081+K08081	7	https:\\www.genome.jp\dbget-bin\www_bget?map00960
ko00730	Thiamine metabolism	1/62	5/341	0.635757	1	pmb0764	C04294	1	5/1082	58/16855	0.315282	1	MD06G1144200;MD01G1041300;MD15G1309900;MD11G1224800;MD07G1220400	K00939+K01662+K01662+K03146+K20896	5	https:\\www.genome.jp\dbget-bin\www_bget?map00730
ko00600	Sphingolipid metabolism	1/62	2/341	0.331016	1	pmb2221	C12144	1	12/1082	158/16855	0.315678	1	MD16G1073700;MD02G1079200;MD03G1114300;MD03G1114800;MD03G1128200;MD03G1258200;MD05G1040600;MD11G1133400;MD11G1278800;MD12G1120300;MD15G1029700;MD14G1051200	K04713+K12309+K12309+K12309+K12309+K12309+K12309+K12309+K12309+K12309+K12309+K23451	12	https:\\www.genome.jp\dbget-bin\www_bget?map00600
ko00380	Tryptophan metabolism	2/62	12/341	0.67485	1	pme1216;mws0597	C10164+C05635	2	16/1082	225/16855	0.372754	1	MD15G1137200;MD05G1117200;MD10G1120200;MD01G1121000;MD01G1121100;MD06G1008700;MD00G1056000;MD05G1184800;MD08G1222800;MD01G1089600;MD01G1219000;MD07G1301000;MD07G1301100;MD09G1089800;MD16G1268200;MD11G1092600	K00128+K01426+K01426+K01593+K01593+K03781+K11816+K11816+K11868+K13066+K13066+K13066+K13066+K22588+K23947+K23947	16	https:\\www.genome.jp\dbget-bin\www_bget?map00380
ko00040	Pentose and glucuronate interconversions	2/62	11/341	0.62516	1	MWSmce676;pme3705	C00216+C00191	2	29/1082	423/16855	0.383633	1	MD13G1009500;MD01G1110100;MD02G1067000;MD02G1238900;MD05G1206000;MD07G1255800;MD10G1025200;MD11G1307200;MD12G1018900;MD15G1224800;MD16G1095400;MD17G1032000;MD01G1068900;MD01G1069000;MD03G1110300;MD06G1105300;MD07G1011600;MD12G1077400;MD12G1077600;MD13G1094100;MD14G1110300;MD16G1097700;MD16G1140500;MD17G1279500;MD13G1146600;MD01G1100600;MD15G1149300;novel.1309;MD01G1177400	K00002+K00008+K01051+K01051+K01051+K01051+K01051+K01051+K01051+K01051+K01184+K01184+K01184+K01184+K01184+K01184+K01184+K01184+K01184+K01184+K01184+K01213+K01213+K01213+K01213+K01728+K01728+K01728+K01805	29	https:\\www.genome.jp\dbget-bin\www_bget?map00040
ko00590	Arachidonic acid metabolism	1/62	2/341	0.331016	1	mws0369	C00219	1	5/1082	70/16855	0.469957	1	MD04G1034400;MD14G1103300;MD17G1016400;MD02G1138300;MD15G1252000	K00432+K00432+K08726+K08726+K08726	5	https:\\www.genome.jp\dbget-bin\www_bget?map00590
ko00220	Arginine biosynthesis	1/62	10/341	0.869535	1	pme0075	C00624	1	7/1082	101/16855	0.473623	1	MD01G1174400;MD14G1002500;MD17G1154300;MD06G1033100;MD09G1270600;MD13G1180400;MD02G1187100	K00261+K00261+K00814+K01438+K01915+K01915+K14682	7	https:\\www.genome.jp\dbget-bin\www_bget?map00220
ko00130	Ubiquinone and other terpenoid-quinone biosynthesis	1/62	4/341	0.553637	1	MWS20194	C00423	1	8/1082	122/16855	0.527665	1	MD03G1051400;MD11G1255200;MD16G1095300;MD13G1094000;MD14G1050700;MD12G1017400;MD16G1255400;MD05G1031400	K00487+K00815+K01661+K01661+K01904+K05928+K09833+K14760	8	https:\\www.genome.jp\dbget-bin\www_bget?map00130
ko01210	2-Oxocarboxylic acid metabolism	5/62	26/341	0.528363	1	Lmbn001288;mws0159;pmb3101;Lmbn001754;pme0075	C06010+C00166+C02504+C04411+C00624	5	9/1082	139/16855	0.538739	1	MD13G1019500;novel.656;MD17G1154300;MD08G1075600;MD15G1063100;MD09G1003700;MD06G1033100;MD11G1059700;MD02G1187100	K00133+K00133+K00814+K00826+K00826+K00928+K01438+K12153+K14682	9	https:\\www.genome.jp\dbget-bin\www_bget?map01210
ko00240	Pyrimidine metabolism	3/62	18/341	0.66762	1	mws0255;pme1194;pme1373	C00380+C00881+C00239	3	10/1082	165/16855	0.620709	1	MD13G1052900;MD16G1178000;MD05G1310000;MD13G1177000;MD00G1085100;MD15G1269600;MD15G1421900;MD00G1139000;MD16G1221200;MD14G1206300	K00876+K01240+K01510+K01510+K01937+K03787+K03787+K10808+K16904+K16904	10	https:\\www.genome.jp\dbget-bin\www_bget?map00240
ko00591	Linoleic acid metabolism	1/62	13/341	0.93012	1	mws0369	C00219	1	3/1082	50/16855	0.630843	1	MD02G1317800;MD09G1180900;MD09G1069500	K00454+K00454+K15718	3	https:\\www.genome.jp\dbget-bin\www_bget?map00591
ko00290	Valine, leucine and isoleucine biosynthesis	3/62	11/341	0.321501	1	Lmbn001288;pmb3101;Lmbn001754	C06010+C02504+C04411	3	2/1082	43/16855	0.772589	1	MD08G1075600;MD15G1063100	K00826+K00826	2	https:\\www.genome.jp\dbget-bin\www_bget?map00290
ko00360	Phenylalanine metabolism	5/62	17/341	0.177984	1	mws0491;MWS20194;Zmyn002323;mws0159;pme2743	C05332+C00423+C05852+C00166+C05598	5	5/1082	105/16855	0.812024	1	MD11G1255200;MD05G1117200;MD10G1120200;MD01G1121000;MD01G1121100	K00815+K01426+K01426+K01593+K01593	5	https:\\www.genome.jp\dbget-bin\www_bget?map00360
ko00760	Nicotinate and nicotinamide metabolism	1/62	14/341	0.943329	1	pme0490	C00253	1	3/1082	68/16855	0.820662	1	MD16G1178000;MD15G1269600;MD15G1421900	K01240+K03787+K03787	3	https:\\www.genome.jp\dbget-bin\www_bget?map00760
ko00340	Histidine metabolism	1/62	10/341	0.869535	1	pme2122	C00388	1	2/1082	49/16855	0.831482	1	MD15G1137200;MD09G1136900	K00128+K19787	2	https:\\www.genome.jp\dbget-bin\www_bget?map00340
ko00053	Ascorbate and aldarate metabolism	2/62	11/341	0.62516	1	MWSmce676;pme3705	C00216+C00191	2	9/1082	194/16855	0.882084	1	MD13G1009500;MD07G1157900;MD15G1095800;MD15G1137200;MD11G1115600;MD02G1127800;MD17G1179500;MD16G1007900;MD14G1111300	K00002+K00103+K00103+K00128+K00423+K00434+K00469+K00469+K08232	9	https:\\www.genome.jp\dbget-bin\www_bget?map00053
ko00230	Purine metabolism	7/62	19/341	0.0385038	1	pme0040;pme0033;pme3961;pme1184;pme1119;pmc0066;pmb0998	C00147+C00262+C00559+C00330+C00294+C06196+C00144	7	14/1082	289/16855	0.893335	1	MD08G1086300;MD11G1001400;MD11G1001600;MD14G1094200;MD06G1144200;MD05G1314100;MD00G1061700;MD05G1310000;MD13G1177000;MD14G1170500;MD10G1228200;MD15G1269600;MD15G1421900;MD00G1139000	K00759+K00873+K00873+K00873+K00939+K01466+K01490+K01510+K01510+K01514+K02083+K03787+K03787+K10808	14	https:\\www.genome.jp\dbget-bin\www_bget?map00230
ko00520	Amino sugar and nucleotide sugar metabolism	3/62	12/341	0.376712	1	pmf0138;pme3705;mws4174	C00159+C00191+C00645	3	20/1082	404/16855	0.911119	1	MD15G1012900;MD04G1144400;MD06G1219200;MD12G1158400;MD09G1265400;MD12G1058400;MD14G1059400;MD14G1085300;MD01G1213300;MD02G1011100;MD06G1183200;MD15G1156900;MD06G1108600;MD08G1034600;MD01G1125200;MD08G1124400;MD17G1127400;MD10G1140000;MD16G1158300;MD16G1158100	K00844+K00847+K00847+K00847+K00975+K00975+K00975+K01097+K01183+K01183+K01183+K01183+K01784+K01810+K08678+K12446+K12448+K13648+K15920+K20547	20	https:\\www.genome.jp\dbget-bin\www_bget?map00520
ko00770	Pantothenate and CoA biosynthesis	1/62	8/341	0.802875	1	Lmbn001288	C06010	1	3/1082	87/16855	0.924033	1	MD15G1137200;MD08G1075600;MD15G1063100	K00128+K00826+K00826	3	https:\\www.genome.jp\dbget-bin\www_bget?map00770
ko00780	Biotin metabolism	1/62	3/341	0.453367	1	Zmjn001813	C02656	1	1/1082	45/16855	0.949697	1	MD14G1002100	K00059	1	https:\\www.genome.jp\dbget-bin\www_bget?map00780
ko00650	Butanoate metabolism	1/62	8/341	0.802875	1	Lmbn001288	C06010	1	1/1082	51/16855	0.966255	1	MD14G1089800	K01640	1	https:\\www.genome.jp\dbget-bin\www_bget?map00650
ko00410	beta-Alanine metabolism	1/62	11/341	0.893973	1	mws0017	C00315	1	3/1082	114/16855	0.979985	1	MD15G1137200;MD04G1191000;MD15G1206900	K00128+K05605+K12259	3	https:\\www.genome.jp\dbget-bin\www_bget?map00410
ko00562	Inositol phosphate metabolism	1/62	4/341	0.553637	1	pme3705	C00191	1	8/1082	234/16855	0.985305	1	MD17G1179500;MD16G1007900;MD05G1107600;MD05G1107700;MD08G1211500;MD03G1165700;MD07G1221900;MD09G1172000	K00469+K00469+K00913+K00913+K00913+K01114+K05857+K05857	8	https:\\www.genome.jp\dbget-bin\www_bget?map00562
ko01040	Biosynthesis of unsaturated fatty acids	2/62	6/341	0.2997	1	mws0397;mws0369	C06428+C00219	2	1/1082	76/16855	0.993617	1	MD10G1014800	K03921	1	https:\\www.genome.jp\dbget-bin\www_bget?map01040
ko00020	Citrate cycle (TCA cycle)	1/62	7/341	0.757942	1	mws2125	C00074	1	3/1082	144/16855	0.995903	1	MD06G1193800;novel.2496;MD05G1005300	K00026+K00627+K01648	3	https:\\www.genome.jp\dbget-bin\www_bget?map00020
ko00400	Phenylalanine, tyrosine and tryptophan biosynthesis	4/62	10/341	0.0879916	1	mws0159;mws2125;mws0154;pme3311	C00166+C00074+C00493+C00354	4	2/1082	116/16855	0.996013	1	MD11G1255200;MD13G1066600	K00815+K01850	2	https:\\www.genome.jp\dbget-bin\www_bget?map00400
ko01240	Biosynthesis of cofactors	7/62	52/341	0.878267	1	pme0490;pmb0764;Zmjn001813;mws2125;mws0154;pme3705;mws0232	C00253+C04294+C02656+C00074+C00493+C00191+C00255	7	25/1082	617/16855	0.996293	1	MD13G1009500;MD14G1002100;MD07G1157900;MD15G1095800;MD15G1137200;MD09G1144600;MD08G1075600;MD15G1063100;MD11G1001400;MD11G1001600;MD14G1094200;MD06G1144200;MD16G1095300;MD13G1094000;MD12G1256700;MD12G1197300;MD00G1085100;MD07G1002800;MD11G1224800;MD12G1017400;MD16G1255400;MD04G1123600;MD12G1139500;MD09G1195300;MD05G1031400	K00002+K00059+K00103+K00103+K00128+K00228+K00826+K00826+K00873+K00873+K00873+K00939+K01661+K01661+K01772+K01885+K01937+K02303+K03146+K05928+K09833+K11153+K11153+K13248+K14760	25	https:\\www.genome.jp\dbget-bin\www_bget?map01240

## Sheet: NNNP vs LNLP
SUPPLEMENTARY TABLE 2 KEGG pathways mapped by differential genes and differential metabolites with higher PCCs
KEGG_map	Description	DiffRatio_meta	BgRatio_meta	P-value_meta	Adjusted P-value_meta	Index_meta	CID_meta	Count_meta	DiffRatio_gene	BgRatio_gene	P-value_gene	Adjusted P-value_gene	Index_gene	KO_gene	Count_gene	Hyperlink
ko00940	Phenylpropanoid biosynthesis	9/92	25/341	0.202828	1	mws1503;mws0017;mws1012;mws0014;mws4085;pmb0751;mws0178;mws0011;HJN003	C00903+C00315+C05851+C01494+C00482+C02947+C00852+C01533+C01175	9	71/675	616/16855	1.13793e-11	1.38828e-09	MD07G1183600;MD15G1008000;MD15G1008100;MD00G1088400;MD01G1162700;MD02G1124700;MD03G1014200;MD03G1274400;MD03G1274500;MD04G1101700;MD04G1170900;MD05G1075100;MD05G1345800;MD06G1038800;MD07G1301400;MD09G1106000;MD10G1321200;MD11G1004100;MD11G1015400;MD11G1061400;MD12G1056000;MD13G1053000;MD13G1246700;MD14G1010300;MD15G1172800;MD15G1238800;MD15G1279900;MD15G1294200;MD15G1321200;MD03G1051100;MD03G1051…	K00083+K00083+K00083+K00430+K00430+K00430+K00430+K00430+K00430+K00430+K00430+K00430+K00430+K00430+K00430+K00430+K00430+K00430+K00430+K00430+K00430+K00430+K00430+K00430+K00430+K00430+K00430+K00430+K00430+K00487+K00487+K00487+K01188+K01188+K01188+K01188+K01188+K01188+K09753+K09753+K09753+K09755+K12355+K12356+K12356+K13065+K13065+K13065+K13065+K13065+K13065+K13065+K13065+K13065+K13065+K13065+K13065+…	71	https:\\www.genome.jp\dbget-bin\www_bget?map00940
ko01110	Biosynthesis of secondary metabolites	35/92	132/341	0.60818	1	pme2292;pmb1096;pme0490;Lmbn001288;mws1503;mws0219;mws1012;Lmbn001676;pme0026;mws1346;mws0154;pme0008;pme0075;pme0278;mws0014;Zmzn000079;mws0282;mws4085;Zmjn003398;MWS2442;mws0866;pme2960;MWS20143;mws0064;MWSHY0029;mws0044;mws0042;pmn001689;pmb0751;pme3311;mws0178;mws0097;mws0232;mws2523;MWS5083	C00134+C00463+C00253+C06010+C00903+C00049+C05851+C14463+C00047+C00956+C00493+C00327+C00624+C00666+C01494+C00279+C00078+C00482+C16308+C00085+C00092+C06561+C01514+C05631+C00389+C01617+C12136+C21924+C02947+C00354+C00852+C05366+C00255+C00689+C00061	35	230/675	4040/16855	9.67205e-10	1.17999e-07	MD16G1010900;novel.510;MD10G1132600;MD07G1183600;MD15G1008000;MD15G1008100;MD15G1137200;MD06G1148800;novel.725;MD15G1133900;MD17G1247400;MD17G1206300;MD09G1080200;MD05G1318900;MD10G1298200;MD10G1298700;MD10G1299300;MD00G1088400;MD01G1162700;MD02G1124700;MD03G1014200;MD03G1274400;MD03G1274500;MD04G1101700;MD04G1170900;MD05G1075100;MD05G1345800;MD06G1038800;MD07G1301400;MD09G1106000;MD10G1321200;MD…	K00016+K00021+K00059+K00083+K00083+K00083+K00128+K00134+K00134+K00166+K00227+K00318+K00318+K00422+K00422+K00422+K00422+K00430+K00430+K00430+K00430+K00430+K00430+K00430+K00430+K00430+K00430+K00430+K00430+K00430+K00430+K00430+K00430+K00430+K00430+K00430+K00430+K00430+K00430+K00430+K00430+K00430+K00430+K00454+K00487+K00487+K00487+K00511+K00511+K00547+K00660+K00688+K00695+K00695+K00695+K00695+K00695+…	230	https:\\www.genome.jp\dbget-bin\www_bget?map01110
ko01100	Metabolic pathways	68/92	258/341	0.727734	1	pme2292;pmb1096;mws2628;mws0491;pme1216;pme0490;pmb0302;pmb0501;ML10197929;Lmbn001288;mws1503;mws0219;Lmbn000198;pme0033;MWSmce580;pmb0764;pme0295;mws0017;pme0193;pme0026;pme1109;Zmyn002323;pmb0819;mws1346;Zmjp000624;pme1292;pme1383;pme3009;mws0154;pme2559;pme0008;mws1155;pme2237;pmb1754;pme0075;pme0278;mws0597;mws0014;Zmzn000079;mws0282;mws4085;Zmyn000110;MWS2442;mws0866;pmb0952;pme1184;pme1119;…	C00134+C00463+C15987+C05332+C10164+C00253+C03557+C00179+C00300+C06010+C00903+C00049+C03064+C00262+C05585+C04294+C02946+C00315+C00064+C00047+C00242+C05852+C02938+C00956+C00250+C00544+C00314+C02341+C00493+C01042+C00327+C00392+C01697+C00588+C00624+C00666+C05635+C01494+C00279+C00078+C00482+C06156+C00085+C00092+C00378+C00330+C00294+C06561+C01514+C19615+C05631+C00389+C01617+C00239+C12144+C02947+C00055+…	68	356/675	7083/16855	6.83231e-09	8.33542e-07	MD01G1110100;MD01G1195500;MD16G1010900;novel.510;MD02G1243100;MD10G1132600;MD07G1183600;MD15G1008000;MD15G1008100;MD07G1157900;MD07G1158000;MD16G1071700;MD13G1071000;MD17G1034800;MD15G1137200;MD02G1009300;MD15G1154800;MD06G1148800;novel.725;MD15G1133900;MD17G1247400;MD03G1116100;MD14G1002500;MD00G1145100;MD08G1126500;MD17G1206300;MD09G1080200;MD05G1318900;MD10G1298200;MD10G1298700;MD10G1299300;MD…	K00008+K00008+K00016+K00021+K00051+K00059+K00083+K00083+K00083+K00103+K00103+K00108+K00108+K00122+K00128+K00131+K00131+K00134+K00134+K00166+K00227+K00253+K00261+K00297+K00306+K00318+K00318+K00422+K00422+K00422+K00422+K00423+K00423+K00430+K00430+K00430+K00430+K00430+K00430+K00430+K00430+K00430+K00430+K00430+K00430+K00430+K00430+K00430+K00430+K00430+K00430+K00430+K00430+K00430+K00430+K00430+K00430+…	356	https:\\www.genome.jp\dbget-bin\www_bget?map01100
ko00945	Stilbenoid, diarylheptanoid and gingerol biosynthesis	2/92	4/341	0.295036	1	pmb0751;mws0178	C02947+C00852	2	20/675	116/16855	3.23583e-08	3.94771e-06	MD03G1051100;MD03G1051400;MD11G1052900;MD16G1109400;MD17G1224900;MD02G1273000;MD04G1016900;MD04G1050800;MD04G1188000;MD05G1218600;MD07G1095200;MD07G1095500;MD09G1169600;MD09G1267700;MD10G1161400;MD10G1199500;MD10G1200300;MD11G1116900;MD14G1011700;novel.2605	K00487+K00487+K00487+K13065+K13065+K13065+K13065+K13065+K13065+K13065+K13065+K13065+K13065+K13065+K13065+K13065+K13065+K13065+K13065+K13065	20	https:\\www.genome.jp\dbget-bin\www_bget?map00945
ko00941	Flavonoid biosynthesis	9/92	27/341	0.284709	1	pme2960;MWS20143;mws0064;MWSHY0029;mws0044;mws0042;pmb0751;mws0178;pme0001	C06561+C01514+C05631+C00389+C01617+C12136+C02947+C00852+C09806	9	22/675	209/16855	3.51965e-05	0.00429397	MD03G1051100;MD03G1051400;MD11G1052900;MD13G1285100;MD03G1001100;MD16G1109400;MD17G1224900;MD02G1273000;MD04G1016900;MD04G1050800;MD04G1188000;MD05G1218600;MD07G1095200;MD07G1095500;MD09G1169600;MD09G1267700;MD10G1161400;MD10G1199500;MD10G1200300;MD11G1116900;MD14G1011700;novel.2605	K00487+K00487+K00487+K00660+K05277+K13065+K13065+K13065+K13065+K13065+K13065+K13065+K13065+K13065+K13065+K13065+K13065+K13065+K13065+K13065+K13065+K13065	22	https:\\www.genome.jp\dbget-bin\www_bget?map00941
ko00380	Tryptophan metabolism	8/92	12/341	0.00400571	0.2804	pmb1096;pme1216;pmb0819;NK10253223;mws0597;mws0282;Zmtn001464;pmb0818	C00463+C10164+C02938+C05831+C05635+C00078+C02470+C05660	8	21/675	225/16855	0.000288464	0.0351926	MD15G1137200;MD10G1120200;MD00G1056000;MD14G1185400;MD06G1163800;MD08G1222800;MD11G1091800;MD07G1300900;MD07G1301000;MD07G1301100;MD10G1029900;MD15G1409200;MD15G1409700;MD02G1094300;MD06G1169600;MD05G1127900;MD03G1085000;MD06G1027500;MD06G1027800;MD11G1074400;MD15G1226200	K00128+K01426+K11816+K11820+K11868+K11868+K11868+K13066+K13066+K13066+K13066+K13066+K13066+K14085+K16903+K22588+K23947+K23947+K23947+K23947+K23947	21	https:\\www.genome.jp\dbget-bin\www_bget?map00380
ko00910	Nitrogen metabolism	1/92	2/341	0.46738	1	pme0193	C00064	1	11/675	85/16855	0.000563854	0.0687902	MD14G1002500;MD00G1015600;MD00G1015700;MD08G1196500;MD10G1022000;MD13G1180400;MD14G1238700;MD11G1141700;MD11G1141800;MD11G1141900;MD13G1096700	K00261+K01455+K01455+K01673+K01673+K01915+K01915+K02575+K02575+K02575+K02575	11	https:\\www.genome.jp\dbget-bin\www_bget?map00910
ko00460	Cyanoamino acid metabolism	1/92	10/341	0.958999	1	mws0219	C00049	1	20/675	266/16855	0.0053063	0.647368	MD00G1190900;MD05G1105800;MD05G1105900;MD12G1211500;MD14G1062500;MD15G1374300;MD00G1015600;MD00G1015700;MD00G1013000;MD03G1091100;MD03G1091900;MD00G1145300;MD12G1211400;MD08G1092600;MD15G1077000;MD00G1052900;MD12G1028800;MD02G1162800;MD17G1125900;MD09G1142800	K01188+K01188+K01188+K01188+K01188+K01188+K01455+K01455+K08248+K08248+K08248+K13031+K13031+K13051+K13051+K16266+K18592+K20802+K22706+K22706	20	https:\\www.genome.jp\dbget-bin\www_bget?map00460
ko00130	Ubiquinone and other terpenoid-quinone biosynthesis	1/92	4/341	0.717555	1	pme1292	C00544	1	10/675	122/16855	0.0246889	1	MD17G1134800;MD03G1051100;MD03G1051400;MD11G1052900;MD17G1235000;MD11G1255200;MD11G1255300;MD13G1094000;MD12G1017400;MD13G1137800	K00457+K00487+K00487+K00487+K00815+K00815+K00815+K01661+K05928+K19222	10	https:\\www.genome.jp\dbget-bin\www_bget?map00130
ko00010	Glycolysis / Gluconeogenesis	1/92	7/341	0.891836	1	mws1521	C01451	1	22/675	355/16855	0.0288913	1	MD16G1010900;MD15G1137200;MD02G1009300;MD15G1154800;MD06G1148800;novel.725;MD17G1180700;MD05G1363600;MD14G1017400;MD05G1354800;MD05G1354900;MD12G1114100;MD16G1179400;MD04G1160100;MD01G1046200;MD00G1040000;MD10G1063600;MD17G1003900;MD17G1023600;MD15G1364700;MD15G1365300;MD02G1094300	K00016+K00128+K00131+K00131+K00134+K00134+K00850+K00850+K00850+K00895+K00895+K00927+K01006+K01568+K01610+K01623+K01623+K01689+K01792+K01834+K03841+K14085	22	https:\\www.genome.jp\dbget-bin\www_bget?map00010
ko00073	Cutin, suberine and wax biosynthesis	1/92	1/341	0.269795	1	MWSslk132	C19615	1	9/675	108/16855	0.0292782	1	MD11G1161800;MD06G1137500;MD09G1007600;MD15G1022800;MD03G1073600;MD13G1004700;MD16G1225400;MD13G1029500;MD13G1208400	K13356+K15400+K15400+K15400+K15401+K15402+K17991+K17991+K20769	9	https:\\www.genome.jp\dbget-bin\www_bget?map00073
ko00270	Cysteine and methionine metabolism	1/92	12/341	0.978648	1	mws0219	C00049	1	16/675	252/16855	0.0471076	1	MD16G1010900;MD00G1181400;MD11G1012700;MD15G1219900;MD17G1235000;MD11G1255200;MD11G1255300;MD05G1110500;MD15G1063100;MD12G1235500;MD06G1118700;MD11G1108600;MD15G1302200;MD17G1106300;MD09G1204500;MD10G1328100	K00016+K00547+K00558+K00789+K00815+K00815+K00815+K00826+K00826+K01738+K01761+K01761+K01762+K05933+K05933+K05933	16	https:\\www.genome.jp\dbget-bin\www_bget?map00270
ko00710	Carbon fixation in photosynthetic organisms	4/92	9/341	0.202011	1	mws0219;Zmzn000079;MWS2442;pme3311	C00049+C00279+C00085+C00354	4	13/675	196/16855	0.0520203	1	MD02G1243100;MD06G1148800;novel.725;MD06G1023500;MD12G1114100;MD16G1179400;MD01G1146300;MD09G1237900;MD01G1046200;MD00G1040000;MD10G1063600;MD15G1365300;MD09G1000800	K00051+K00134+K00134+K00855+K00927+K01006+K01100+K01595+K01610+K01623+K01623+K03841+K05298	13	https:\\www.genome.jp\dbget-bin\www_bget?map00710
ko00250	Alanine, aspartate and glutamate metabolism	3/92	12/341	0.672197	1	mws0219;pme0193;pme2559	C00049+C00064+C01042	3	9/675	127/16855	0.0690262	1	MD14G1002500;MD03G1168700;MD11G1194500;MD16G1010800;MD13G1180400;MD14G1238700;MD00G1095400;MD08G1092600;MD15G1077000	K00261+K00830+K00830+K01580+K01915+K01915+K01953+K13051+K13051	9	https:\\www.genome.jp\dbget-bin\www_bget?map00250
ko00030	Pentose phosphate pathway	1/92	7/341	0.891836	1	Zmzn000079	C00279	1	10/675	148/16855	0.0739436	1	MD02G1009300;MD15G1154800;MD17G1180700;MD05G1363600;MD14G1017400;MD05G1354800;MD05G1354900;MD00G1040000;MD10G1063600;MD15G1365300	K00131+K00131+K00850+K00850+K00850+K00895+K00895+K01623+K01623+K03841	10	https:\\www.genome.jp\dbget-bin\www_bget?map00030
ko00480	Glutathione metabolism	2/92	8/341	0.683281	1	pme2292;mws0017	C00134+C00315	2	14/675	237/16855	0.0953888	1	MD17G1133800;MD04G1139600;MD05G1184300;MD05G1184600;MD05G1210600;MD12G1155200;MD13G1081900;MD13G1082200;MD03G1264800;MD07G1097400;MD07G1113400;MD07G1247000;novel.349;MD12G1028800	K00799+K00799+K00799+K00799+K00799+K00799+K00799+K00799+K01255+K01255+K01255+K01255+K01255+K18592	14	https:\\www.genome.jp\dbget-bin\www_bget?map00480
ko00960	Tropane, piperidine and pyridine alkaloid biosynthesis	3/92	10/341	0.534767	1	pme2292;pme0490;pme0026	C00134+C00253+C00047	3	6/675	79/16855	0.0966146	1	MD17G1235000;MD11G1255200;MD11G1255300;MD04G1135300;MD11G1093500;MD12G1148400	K00815+K00815+K00815+K08081+K08081+K08081	6	https:\\www.genome.jp\dbget-bin\www_bget?map00960
ko00966	Glucosinolate biosynthesis	1/92	8/341	0.92163	1	mws0282	C00078	1	3/675	28/16855	0.100011	1	MD05G1110500;MD15G1063100;MD14G1185400	K00826+K00826+K11820	3	https:\\www.genome.jp\dbget-bin\www_bget?map00966
ko01200	Carbon metabolism	4/92	20/341	0.837382	1	mws0219;Zmzn000079;MWS2442;pme3311	C00049+C00279+C00085+C00354	4	32/675	649/16855	0.131546	1	MD02G1243100;MD17G1034800;MD02G1009300;MD15G1154800;MD06G1148800;novel.725;MD14G1002500;MD00G1145100;MD03G1168700;MD11G1194500;MD17G1180700;MD05G1363600;MD14G1017400;MD06G1023500;MD12G1114100;MD16G1179400;MD01G1146300;MD00G1015600;MD00G1015700;MD09G1237900;MD01G1046200;MD00G1040000;MD10G1063600;MD06G1147700;MD03G1292300;MD17G1003900;MD12G1235500;MD15G1364700;MD15G1365300;MD09G1000800;MD10G1195700…	K00051+K00122+K00131+K00131+K00134+K00134+K00261+K00297+K00830+K00830+K00850+K00850+K00850+K00855+K00927+K01006+K01100+K01455+K01455+K01595+K01610+K01623+K01623+K01638+K01679+K01689+K01738+K01834+K03841+K05298+K11517+K15893	32	https:\\www.genome.jp\dbget-bin\www_bget?map01200
ko00300	Lysine biosynthesis	4/92	6/341	0.0474962	1	mws0219;pme0026;mws1346;pme0278	C00049+C00047+C00956+C00666	4	3/675	32/16855	0.135065	1	MD08G1175700;novel.1498;novel.1499	K10206+K10206+K10206	3	https:\\www.genome.jp\dbget-bin\www_bget?map00300
ko00591	Linoleic acid metabolism	2/92	13/341	0.907001	1	Lmbn005287;Lmbn005487	C07354+C14829	2	4/675	50/16855	0.13928	1	MD02G1317800;MD13G1235500;MD04G1204500;MD12G1219300	K00454+K01047+K15718+K15718	4	https:\\www.genome.jp\dbget-bin\www_bget?map00591
ko00944	Flavone and flavonol biosynthesis	5/92	15/341	0.379124	1	MWS20143;MWSHY0029;mws0919;mws0913;Lmyn001269	C01514+C00389+C16911+C12626+C12634	5	3/675	39/16855	0.204329	1	MD17G1060500;MD17G1060600;MD17G1071300	K13264+K13264+K13264	3	https:\\www.genome.jp\dbget-bin\www_bget?map00944
ko00350	Tyrosine metabolism	2/92	12/341	0.879606	1	MWSmce580;pme1292	C05585+C00544	2	8/675	146/16855	0.231319	1	MD05G1318900;MD10G1298200;MD10G1298700;MD10G1299300;MD17G1134800;MD17G1235000;MD11G1255200;MD11G1255300	K00422+K00422+K00422+K00422+K00457+K00815+K00815+K00815	8	https:\\www.genome.jp\dbget-bin\www_bget?map00350
ko00630	Glyoxylate and dicarboxylate metabolism	1/92	10/341	0.958999	1	pme0193	C00064	1	11/675	213/16855	0.23551	1	MD17G1034800;MD03G1168700;MD11G1194500;MD00G1015600;MD00G1015700;MD06G1147700;MD13G1180400;MD14G1238700;MD10G1195700;MD05G1122100;MD03G1233500	K00122+K00830+K00830+K01455+K01455+K01638+K01915+K01915+K11517+K15893+K22133	11	https:\\www.genome.jp\dbget-bin\www_bget?map00630
ko00051	Fructose and mannose metabolism	1/92	5/341	0.794662	1	mws1155	C00392	1	10/675	201/16855	0.286317	1	MD01G1110100;MD01G1195500;MD17G1180700;MD05G1363600;MD14G1017400;MD05G1354800;MD05G1354900;MD00G1040000;MD10G1063600;MD15G1365300	K00008+K00008+K00850+K00850+K00850+K00895+K00895+K01623+K01623+K03841	10	https:\\www.genome.jp\dbget-bin\www_bget?map00051
ko00402	Benzoxazinoid biosynthesis	1/92	1/341	0.269795	1	pmb1096	C00463	1	3/675	47/16855	0.290728	1	MD16G1215000;MD16G1215200;MD14G1028700	K13229+K13229+K13229	3	https:\\www.genome.jp\dbget-bin\www_bget?map00402
ko00565	Ether lipid metabolism	1/92	1/341	0.269795	1	mws0120	C00670	1	4/675	70/16855	0.307753	1	MD13G1235500;MD07G1077500;MD04G1197500;MD15G1237100	K01047+K01114+K01115+K01115	4	https:\\www.genome.jp\dbget-bin\www_bget?map00565
ko00562	Inositol phosphate metabolism	1/92	4/341	0.717555	1	mws0866	C00092	1	11/675	234/16855	0.336615	1	MD17G1179500;MD16G1007900;novel.1980;MD14G1033300;MD16G1029100;MD17G1043500;MD07G1077500;MD00G1087100;MD07G1221900;MD17G1043400;MD11G1281400	K00469+K00469+K00913+K00921+K00921+K01099+K01114+K01765+K05857+K24221+K24221	11	https:\\www.genome.jp\dbget-bin\www_bget?map00562
ko00053	Ascorbate and aldarate metabolism	1/92	11/341	0.970395	1	Lmbn000198	C03064	1	9/675	194/16855	0.374366	1	MD07G1157900;MD07G1158000;MD15G1137200;MD04G1083900;MD11G1182500;MD17G1179500;MD16G1007900;MD02G1094300;MD16G1012000	K00103+K00103+K00128+K00423+K00423+K00469+K00469+K14085+K19642	9	https:\\www.genome.jp\dbget-bin\www_bget?map00053
ko00592	alpha-Linolenic acid metabolism	3/92	9/341	0.455311	1	Zmjn003398;Zmyn004732;pmn001689	C16308+C16342+C21924	3	8/675	171/16855	0.37803	1	MD02G1317800;MD13G1235500;MD10G1085800;MD12G1067300;MD15G1401300;MD17G1100800;MD02G1172900;MD06G1050100	K00454+K01047+K01723+K05894+K05894+K10528+K16818+K16818	8	https:\\www.genome.jp\dbget-bin\www_bget?map00592
ko02010	ABC transporters	12/92	44/341	0.545409	1	pme2292;pmb0302;mws0219;mws0017;pme0193;pme0026;mws1155;pmb0952;pme1184;pme1119;mws0232;pme2125	C00134+C03557+C00049+C00315+C00064+C00047+C00392+C00378+C00330+C00294+C00255+C00492	12	10/675	220/16855	0.386895	1	MD17G1049600;MD17G1149200;MD11G1272000;MD13G1170400;MD16G1109500;MD07G1281200;MD07G1281300;MD14G1044500;MD17G1184700;MD11G1159100	K05658+K05658+K05658+K05658+K05666+K05681+K05681+K05681+K08711+K08711	10	https:\\www.genome.jp\dbget-bin\www_bget?map02010
ko00260	Glycine, serine and threonine metabolism	3/92	11/341	0.607382	1	ML10197929;mws0219;mws0282	C00300+C00049+C00078	3	8/675	173/16855	0.39026	1	MD16G1071700;MD13G1071000;MD08G1126500;MD03G1168700;MD11G1194500;MD15G1364700;MD02G1094300;MD05G1122100	K00108+K00108+K00306+K00830+K00830+K01834+K14085+K15893	8	https:\\www.genome.jp\dbget-bin\www_bget?map00260
ko00360	Phenylalanine metabolism	2/92	17/341	0.968435	1	mws0491;Zmyn002323	C05332+C05852	2	5/675	105/16855	0.41204	1	MD17G1134800;MD17G1235000;MD11G1255200;MD11G1255300;MD10G1120200	K00457+K00815+K00815+K00815+K01426	5	https:\\www.genome.jp\dbget-bin\www_bget?map00360
ko00750	Vitamin B6 metabolism	4/92	4/341	0.00504792	0.353354	pme0193;Zmjp000624;pme1383;Zmzn000079	C00064+C00250+C00314+C00279	4	2/675	37/16855	0.439526	1	MD03G1113000;MD17G1175900	K08681+K13248	2	https:\\www.genome.jp\dbget-bin\www_bget?map00750
ko00564	Glycerophospholipid metabolism	2/92	6/341	0.513544	1	pmb1754;mws0120	C00588+C00670	2	11/675	259/16855	0.464696	1	MD13G1235500;MD07G1077500;MD04G1197500;MD15G1237100;MD17G1203800;MD17G1278500;MD07G1136200;MD09G1043100;MD02G1172900;MD06G1050100;MD09G1006500	K01047+K01114+K01115+K01115+K06130+K13508+K13508+K13508+K16818+K16818+K18696	11	https:\\www.genome.jp\dbget-bin\www_bget?map00564
ko00400	Phenylalanine, tyrosine and tryptophan biosynthesis	5/92	10/341	0.100156	1	pmb1096;mws0154;Zmzn000079;mws0282;pme3311	C00463+C00493+C00279+C00078+C00354	5	5/675	116/16855	0.49813	1	MD17G1235000;MD11G1255200;MD11G1255300;MD11G1078000;MD16G1065700	K00815+K00815+K00815+K01657+K01850	5	https:\\www.genome.jp\dbget-bin\www_bget?map00400
ko00330	Arginine and proline metabolism	5/92	18/341	0.561954	1	pme2292;pmb0501;ML10197929;pme0295;mws0017	C00134+C00179+C00300+C02946+C00315	5	6/675	141/16855	0.498713	1	MD15G1137200;MD17G1206300;MD09G1080200;MD10G1120200;MD05G1055300;MD02G1094300	K00128+K00318+K00318+K01426+K01583+K14085	6	https:\\www.genome.jp\dbget-bin\www_bget?map00330
ko00310	Lysine degradation	2/92	11/341	0.845038	1	pme0026;mws1346	C00047+C00956	2	4/675	92/16855	0.505885	1	MD15G1137200;MD08G1126500;MD02G1094300;MD02G1105300	K00128+K00306+K14085+K14157	4	https:\\www.genome.jp\dbget-bin\www_bget?map00310
ko00290	Valine, leucine and isoleucine biosynthesis	2/92	11/341	0.845038	1	Lmbn001288;Lmbn001676	C06010+C14463	2	2/675	43/16855	0.518385	1	MD05G1110500;MD15G1063100	K00826+K00826	2	https:\\www.genome.jp\dbget-bin\www_bget?map00290
ko00052	Galactose metabolism	4/92	18/341	0.76426	1	pme2237;MWS2442;pme2125;Lmqn000213	C01697+C00085+C00492+C01613	4	11/675	272/16855	0.530324	1	MD17G1180700;MD05G1363600;MD14G1017400;MD17G1218200;MD04G1064600;MD09G1285100;MD02G1079200;MD11G1133100;MD12G1120300;MD04G1190900;MD13G1093700	K00850+K00850+K00850+K01193+K01784+K06611+K12309+K12309+K12309+K18819+K18819	11	https:\\www.genome.jp\dbget-bin\www_bget?map00052
ko00590	Arachidonic acid metabolism	1/92	2/341	0.46738	1	MWS2673	C14772	1	3/675	70/16855	0.535637	1	MD13G1235500;MD17G1016400;MD12G1028800	K01047+K08726+K18592	3	https:\\www.genome.jp\dbget-bin\www_bget?map00590
ko00340	Histidine metabolism	1/92	10/341	0.958999	1	mws0219	C00049	1	2/675	49/16855	0.589503	1	MD15G1137200;MD02G1094300	K00128+K14085	2	https:\\www.genome.jp\dbget-bin\www_bget?map00340
ko01230	Biosynthesis of amino acids	11/92	43/341	0.650249	1	Lmbn001288;mws0219;pme0193;pme0026;mws1346;mws0154;pme0008;pme0075;pme0278;Zmzn000079;mws0282	C06010+C00049+C00064+C00047+C00956+C00493+C00327+C00624+C00666+C00279+C00078	11	22/675	574/16855	0.615586	1	MD06G1148800;novel.725;MD15G1219900;MD05G1110500;MD15G1063100;MD17G1180700;MD05G1363600;MD14G1017400;MD12G1114100;MD00G1040000;MD10G1063600;MD11G1078000;MD17G1003900;MD12G1235500;MD15G1364700;MD16G1065700;MD13G1180400;MD14G1238700;MD00G1095400;MD08G1175700;novel.1498;novel.1499	K00134+K00134+K00789+K00826+K00826+K00850+K00850+K00850+K00927+K01623+K01623+K01657+K01689+K01738+K01834+K01850+K01915+K01915+K01953+K10206+K10206+K10206	22	https:\\www.genome.jp\dbget-bin\www_bget?map01230
ko00240	Pyrimidine metabolism	4/92	18/341	0.76426	1	pme0193;pme1373;MWSslk257;pme3188	C00064+C00239+C00055+C00105	4	6/675	165/16855	0.652216	1	MD14G1218200;MD12G1022900;MD08G1034400;MD15G1031300;MD00G1085100;MD16G1192900	K00876+K01240+K01520+K01520+K01937+K03787	6	https:\\www.genome.jp\dbget-bin\www_bget?map00240
ko00770	Pantothenate and CoA biosynthesis	2/92	8/341	0.683281	1	Lmbn001288;mws0219	C06010+C00049	2	3/675	87/16855	0.68256	1	MD15G1137200;MD05G1110500;MD15G1063100	K00128+K00826+K00826	3	https:\\www.genome.jp\dbget-bin\www_bget?map00770
ko00500	Starch and sucrose metabolism	3/92	9/341	0.455311	1	MWS2442;mws0866;mws2523	C00085+C00092+C00689	3	31/675	836/16855	0.698864	1	MD08G1156600;MD17G1277700;MD02G1044300;MD05G1100200;MD15G1416500;novel.387;novel.389;MD10G1002300;MD14G1059400;MD08G1180400;MD15G1365900;MD01G1137400;MD05G1081100;MD08G1006000;MD08G1101700;MD16G1175300;MD04G1056200;MD03G1291200;novel.2703;MD00G1190900;MD05G1105800;MD05G1105900;MD12G1211500;MD14G1062500;MD15G1374300;MD17G1218200;MD14G1183700;MD02G1183900;MD09G1121800;MD00G1058100;MD10G1261700	K00688+K00695+K00695+K00695+K00695+K00695+K00695+K00696+K00975+K01087+K01087+K01176+K01176+K01176+K01176+K01177+K01177+K01179+K01179+K01188+K01188+K01188+K01188+K01188+K01188+K01193+K16055+K19891+K19891+K19892+K19892	31	https:\\www.genome.jp\dbget-bin\www_bget?map00500
ko00901	Indole alkaloid biosynthesis	1/92	3/341	0.611926	1	mws0282	C00078	1	1/675	34/16855	0.751178	1	MD13G1052500	K01757	1	https:\\www.genome.jp\dbget-bin\www_bget?map00901
ko00760	Nicotinate and nicotinamide metabolism	4/92	14/341	0.549783	1	mws2628;pme0490;mws0219;mws0675	C15987+C00253+C00049+C00455	4	2/675	68/16855	0.762406	1	MD12G1022900;MD16G1192900	K01240+K03787	2	https:\\www.genome.jp\dbget-bin\www_bget?map00760
ko00600	Sphingolipid metabolism	1/92	2/341	0.46738	1	pmb2221	C12144	1	5/675	158/16855	0.763358	1	MD10G1041400;MD02G1079200;MD11G1133100;MD12G1120300;MD08G1245400	K04713+K12309+K12309+K12309+K17108	5	https:\\www.genome.jp\dbget-bin\www_bget?map00600
ko00220	Arginine biosynthesis	4/92	10/341	0.269913	1	mws0219;pme0193;pme0008;pme0075	C00049+C00064+C00327+C00624	4	3/675	101/16855	0.775222	1	MD14G1002500;MD13G1180400;MD14G1238700	K00261+K01915+K01915	3	https:\\www.genome.jp\dbget-bin\www_bget?map00220
ko01040	Biosynthesis of unsaturated fatty acids	2/92	6/341	0.513544	1	mws0397;pmn001606	C06428+C16526	2	2/675	76/16855	0.813945	1	MD13G1107000;MD14G1058300	K10251+K10256	2	https:\\www.genome.jp\dbget-bin\www_bget?map01040
ko00520	Amino sugar and nucleotide sugar metabolism	2/92	12/341	0.879606	1	Zmyn000110;Lmqn000780	C06156+C00043	2	13/675	404/16855	0.82702	1	MD14G1059400;MD02G1011100;MD02G1011200;MD02G1011400;MD04G1047700;MD04G1064600;MD01G1125200;MD08G1124400;MD17G1127400;MD16G1158300;MD16G1158100;MD02G1120200;MD04G1029400	K00975+K01183+K01183+K01183+K01183+K01784+K08678+K12446+K12448+K15920+K20547+K20547+K20547	13	https:\\www.genome.jp\dbget-bin\www_bget?map00520
ko00410	beta-Alanine metabolism	3/92	11/341	0.607382	1	MWS2413;mws0219;mws0017	C01073+C00049+C00315	3	3/675	114/16855	0.840218	1	MD15G1137200;MD16G1010800;MD02G1094300	K00128+K01580+K14085	3	https:\\www.genome.jp\dbget-bin\www_bget?map00410
ko00780	Biotin metabolism	1/92	3/341	0.611926	1	pme0026	C00047	1	1/675	45/16855	0.841447	1	MD10G1132600	K00059	1	https:\\www.genome.jp\dbget-bin\www_bget?map00780
ko00650	Butanoate metabolism	1/92	8/341	0.92163	1	Lmbn001288	C06010	1	1/675	51/16855	0.876016	1	MD16G1010800	K01580	1	https:\\www.genome.jp\dbget-bin\www_bget?map00650
ko00730	Thiamine metabolism	2/92	5/341	0.409129	1	pmb0764;pmb0952	C04294+C00378	2	1/675	58/16855	0.906952	1	MD11G1224800	K03146	1	https:\\www.genome.jp\dbget-bin\www_bget?map00730
ko01210	2-Oxocarboxylic acid metabolism	7/92	26/341	0.581889	1	Lmbn001288;mws0219;Lmbn001676;pme0026;mws1346;pme0075;mws0282	C06010+C00049+C14463+C00047+C00956+C00624+C00078	7	3/675	139/16855	0.920753	1	MD05G1110500;MD15G1063100;MD14G1185400	K00826+K00826+K11820	3	https:\\www.genome.jp\dbget-bin\www_bget?map01210
ko00740	Riboflavin metabolism	2/92	4/341	0.295036	1	mws0232;MWS5083	C00255+C00061	2	1/675	67/16855	0.935679	1	MD13G1016100	K14379	1	https:\\www.genome.jp\dbget-bin\www_bget?map00740
ko01240	Biosynthesis of cofactors	14/92	52/341	0.564182	1	pme0490;mws0219;pmb0764;pme0193;Zmjp000624;pme1292;pme1383;mws0154;Zmzn000079;mws0282;pmb0952;pme3188;mws0232;MWS5083	C00253+C00049+C04294+C00064+C00250+C00544+C00314+C00493+C00279+C00078+C00378+C00105+C00255+C00061	14	18/675	617/16855	0.939894	1	MD10G1132600;MD07G1157900;MD07G1158000;MD15G1137200;MD17G1134800;MD15G1219900;MD05G1110500;MD15G1063100;MD13G1094000;MD00G1085100;MD11G1224800;MD12G1017400;MD03G1113000;MD04G1123600;MD12G1139500;MD17G1175900;MD13G1137800;MD16G1012000	K00059+K00103+K00103+K00128+K00457+K00789+K00826+K00826+K01661+K01937+K03146+K05928+K08681+K11153+K11153+K13248+K19222+K19642	18	https:\\www.genome.jp\dbget-bin\www_bget?map01240
ko00970	Aminoacyl-tRNA biosynthesis	4/92	18/341	0.76426	1	mws0219;pme0193;pme0026;mws0282	C00049+C00064+C00047+C00078	4	4/675	228/16855	0.98285	1	MD07G1030400;MD11G1012400;MD10G1133100;MD10G1070400	K01870+K01870+K01872+K02433	4	https:\\www.genome.jp\dbget-bin\www_bget?map00970
ko00190	Oxidative phosphorylation	1/92	5/341	0.794662	1	MWS5083	C00061	1	3/675	290/16855	0.999431	1	MD08G1130200;MD10G1321500;MD11G1159600	K01535+K02115+K03884	3	https:\\www.genome.jp\dbget-bin\www_bget?map00190
ko00230	Purine metabolism	5/92	19/341	0.617071	1	pme0033;pme0193;pme1109;pme1184;pme1119	C00262+C00064+C00242+C00330+C00294	5	2/675	289/16855	0.999911	1	MD08G1086300;MD16G1192900	K00759+K03787	2	https:\\www.genome.jp\dbget-bin\www_bget?map00230
